# Buildup and bistability in auditory streaming as an evidence accumulation process with saturation

Quynh-Anh Nguyen<sup>1</sup>✉, John Rinzel<sup>2,3</sup>, Rodica Curtu<sup>1,4\*</sup>

**1** Department of Mathematics, The University of Iowa, Iowa City, Iowa, United States of America

**2** Center for Neural Science, New York University, New York, New York, United States of America

**3** Courant Institute of Mathematical Sciences, New York University, New York, New York, United States of America

**4** Iowa Neuroscience Institute, Human Brain Research Laboratory, Iowa City, Iowa, United States of America

✉Current Address: Department of Mathematical Sciences, Indiana University-Purdue University Indianapolis (IUPUI), Indianapolis, Indiana, United States of America

\* Corresponding author:

E-mail: [rodica-curtu@uiowa.edu](mailto:rodica-curtu@uiowa.edu) (RC)

## Abstract

A repeating triplet-sequence  $ABA_$  of non-overlapping brief tones,  $A$  and  $B$ , is a valued paradigm for studying auditory stream formation and the cocktail party problem. The stimulus is “heard” either as a galloping pattern (integration) or as two interleaved streams (segregation); the initial percept is typically integration then followed by spontaneous alternations between segregation and integration, each being dominant for a few seconds. The probability of segregation grows over seconds, from near-zero to a steady value, defining the buildup function, BUF. Its stationary level increases with the difference in tone frequencies,  $DF$ , and the BUF rises faster. Percept durations have  $DF$ -dependent means and are gamma-like distributed. Behavioral and computational studies usually characterize triplet streaming either during alternations or during buildup. Here, our experimental design and modeling encompass both. We propose a pseudo-neuromechanistic model that incorporates spiking activity in primary auditory cortex, A1, as input and resolves perception along two network-layers downstream of A1. Our model is straightforward and intuitive. It describes the noisy accumulation of evidence against the current percept which generates switches when reaching a threshold. Accumulation can saturate either above or below threshold; if below, the switching dynamics resemble noise-induced transitions from an attractor state. Our model accounts quantitatively for three key features of data: the BUFs, mean durations, and normalized dominance duration distributions, at various  $DF$  values. It describes perceptual alternations without competition per se, and underscores that treating triplets in the sequence independently and averaging across trials, as implemented in earlier widely cited studies, is inadequate.

## Author summary

41

Segregation of auditory objects (auditory streaming) is widely studied using ambiguous  
stimuli. A sequence of repeating triplets  $ABA_...$  of non-overlapping brief pure tones,  $A$   
and  $B$ , frequency-separated, is a valued stimulus. Studies typically focus on one of two  
behavioral phases: the early (say, ten seconds) buildup of segregation from the default  
integration or later spontaneous alternations (bistability) between seconds-long  
integration and segregation percepts. Our experiments and modeling encompass both.  
Our novel, data-driven, evidence-accumulation model accounts for key features of the  
observations, taking as input recorded spiking activity from primary auditory cortex (as  
opposed to most existing, more abstract, models). Our results underscore that assessing  
individual triplets independently and averaging across trials, as in some earlier studies,  
is inadequate (lacking neuronal-accountability for percept duration statistics, the  
underlying basis of buildup). Further, we identify fresh parallels between evidence  
accumulation and competition as potential dynamic processes for choice in the brain.

42

43

44

45

46

47

48

49

50

51

52

53

54

## Introduction

Stimulus sequences of interleaved  $A$  and  $B$  pure tones have been widely used in studying segregation of distinct objects in an auditory scene (auditory streaming), in human psychophysics [1–6], invasive neurophysiology [1, 3, 7, 8], or in experiments implementing both [9]. A valued stimulus is triplet-streaming  $ABA_+$  with the tone frequency difference,  $DF$ , as a tunable parameter [10]; Fig 1. For small  $DF$  human listeners most likely perceive integration (one galloping rhythm); for  $DF$  large, segregation dominates (two simultaneously heard parallel streams). The initial percept is typically integration but within seconds the probability of segregation increases (“the buildup phase”) and perceptual switching eventually occurs (“perceptual bistability”). Alternating percepts have variable durations, described by either gamma or lognormal distributions [2]. Time courses of spiking activity (macaque, primary auditory cortex, A1, [1]) show dynamical features (adaptation over 1-2 seconds) that were interpreted as neural correlates of buildup, although the behavioral and physiological experiments were not conducted together [1, 3].

Dynamics of buildup and/or perceptual alternation for ambiguous auditory stimuli were described by computational models based on signal processing [1, 3, 11–13], competition dynamics [6, 14], coupled-oscillator patterning [15, 16], evidence accumulation [5], and statistical descriptions [17]; also reviews by [18] and [19]. However, with few exceptions (e.g. [1, 6]) these models did not incorporate neurophysiological data. Furthermore, experimental and modeling studies primarily focused on either buildup, describing the probability of segregation during short, tens of seconds, trials [1, 3, 4, 20, 21], or on the stationary phase of alternations, characterizing the statistics of percept durations over long, several minutes, trials [2, 5, 6].

Here we designed the experiment (30 s trials with many trials per condition/subject) so that we could characterize these features simultaneously. Then we proposed a model

that takes spike-recordings from A1 as input, and accounts for both the behavioral time  
course of buildup and the observed duration statistics during alternations, over a range  
of  $DF$  values: 3, 5, 7 semitones. Our model is neuromechanistic-like, transforming the  
neuronal input for processing in two evidence-accumulators downstream of A1. From the  
input-sensory level, sampling of spike counts across A1-units provides a measure for the  
contribution of each triplet to the evidence-accumulation stage; if evidence against the  
current percept exceeds a threshold then a perceptual switch occurs and accumulation  
resets. This approach parallels in spirit Barniv and Nelken's model [5] although that  
was implemented from a Bayesian-viewpoint. Our model is data-driven: input is  
neural-based; initial parameters are estimated from our behavior data (mean probability  
of segregation) then fine-tuned to match the gamma-distributed percept durations.

We propose that although the model is not competition-based it shares some  
features of such approaches: Adaptation is key in competition dynamics; evidence  
accumulation might be viewed as recovery from adaptation. Matching duration  
statistics with competition requires some balancing of noise and adaptation [22]; its  
analogue is the interplay between accumulation and noise. Adaptation strength, when  
set near the boundary between noise-free oscillatory and noise-driven attractor  
dynamics, constrains dominance durations [23]; comparably, our accumulators have a  
novel feature of saturation which if set below but near the switching threshold, produces  
observed statistics only if adequate noise is present.

Importantly, our modeling highlights that accounting for the duration statistics of  
behavioral data is key when studying auditory bistable perception. With quantitative  
matches to these data the buildup phase is then naturally reproducible by an alternating  
renewal process [17]. We show that a widely cited signal-detection approach [1, 3, 12, 21],  
based on treating each triplet independently without accumulation, that overlooked this  
crucial feature does not account for the single-trial percept duration statistics. We

argue for caution when applying it to test neural-inspired behavioral hypotheses. 107

## Results 108

We first outline the rationale for our study and presentation. In behavioral experiments 109  
human participants continuously reported their ongoing perception, integration or 110  
segregation, which after analysis yielded distributions for percept durations (Section A). 111  
We introduce the essence of our **E**Vidence **A**ccumulation (EVA) model in a basic form 112  
(Section B.1). With each triplet we suppose there is an incremental urge  $r$ , to switch 113  
from the current percept/interpretation to the alternate one;  $r$  is the “drift” rate for the 114  
event sequence that, with zero-mean noise, drives fluctuating accumulation in the EVA 115  
model that eventually surpasses threshold. We illustrate that this basic model captures 116  
the duration statistics for a chosen case, near-equidominance. We next elaborate the 117  
model by formulating a neuronal basis for evaluating  $r$  (Section B.2). We utilize the 118  
single-unit spike counts for  $A$ -tone selective A1 neurons recorded over a range of 119  
experimental conditions [1] and applied them to our case of  $DF=3, 5, 7$ . The relative 120  
responses to  $B$ -tones are viewed, according to the population separation hypothesis [7], 121  
as evidence for segregation (against integration) when spike counts are generally smaller, 122  
or against segregation when larger. A challenge arises. If  $N_{in}$  A1 neurons are recorded 123  
the spike count deviates from the mean like  $1/\sqrt{N_{in}}$ . Thus, if  $N_{in}$  is large and one 124  
supposes a fixed threshold for signal detection, the classification based on spike counts 125  
becomes binary and problematic for resolving a perceptual response that is graded over 126  
conditions. Our full EVA model (Section B.3) attempts to meet the challenge by having 127  
a two-layer pre-processing stage that includes  $N_{sl}$  units, each of them sampling a few A1 128  
neurons ( $N_{in}$  not large). The proportion of  $N_{sl}$  units which respond to thresholded 129  
activity over neuronal ensembles in A1 provides the incremental evidence, the value of  $r$ , 130  
for the accumulator that favors integration. The complementary proportion of  $N_{sl}$  units 131

that do not respond to thresholded A1 activity provides the incremental evidence to the  
accumulator against integration.

Our approach overcomes two shortcomings of a well-known signal detection model  
for auditory streaming [1]. The Micheyl et al treatment [1] does not account for  
single-trial data, the duration distributions which form the basis for computing the  
buildup function (BUF); it averages across trials, without accumulating evidence  
event-to-event. The signal detection scheme of Micheyl does not resolve, with  $N_{in}$  large,  
a family of BUFs that show gradation across conditions.

In short, we combined neural data from [1] with behavioral data from our  
experiments (see Section A) to investigate if the signal detection model when applied on  
a single-trial basis could yield percept durations in a self-consistent fashion. We found it  
did not; and moreover that it was unable to fit buildup functions that, for different  
stimulus conditions, were graded, not widely separated (Section C). We then developed a  
neural-based evidence accumulation-like explanation of the observed data, as alternative  
to explicit competition, and with the advantage of being intuitive (Section B).

## A. Auditory triplet-streaming

### A.1. Experimental protocol

Fifteen human subjects with normal hearing listened to sequences of repeating  $ABA_-$   
triplets and were instructed to continuously report their ongoing percept by selectively  
pressing one of two different buttons on a keypad. Subjects began reporting their  
percept typically 2 s after stimulus onset as integration ( $I$ ; a single, coherent stream  
 $ABA_-\text{ABA}_-$ ) or segregation ( $S$ ; two distinct streams  $A_-\text{A}_-\text{A}_-\text{A}_-$  and  $-\text{B}_-\text{B}_-\text{B}_-$ ).  
Stimuli were sequences of triplets  $ABA_-$  that consisted of alternating high ( $A$ ) and low  
( $B$ ) pure tones followed by a 125 ms silent pause “\_” (Fig 1A-B). In total, triplets were  
500-ms in duration and were repeated 60 times per trial. Tones were separated in

frequency by  $DF$  semitones chosen from three conditions ( $DF= 3, 5, 7$ ) with each  
condition being presented five times per experimental block (nine blocks total). This  
resulted in group data (from 15 subjects and 45 trials per subject) with 675 30-s trials  
for each of three  $DF$  values.

## A.2. Behavioral task performance

For each  $DF$  condition the buildup function was constructed by computing the  
probability of segregation from trial-averaging (Fig 1 B-C). The buildup functions  
started at zero and increased over time before stabilizing to certain  $DF$ -dependent  
asymptotic values, similar to reports by [1, 3, 5, 12]. They started at zero due to the  
latency period (when no percept was identified) and not because the initial percept was  
 $I$ ; see *Methods*, also [4]. While  $I$  first percepts were indeed more likely,  $S$  first percepts  
were reported too. The proportion of segregation as initial percept increased with  $DF$   
from 103 out of 675 trials at  $DF=3$  to 137 at  $DF=5$  and 220 at  $DF=7$ . The  
probability of segregation increased faster and reached higher levels at larger  $DF$ , with  
transient times of approximately 16, 10, 5 s after stimulus onset and with asymptotic  
values 0.45, 0.6, and 0.65 at  $DF= 3, 5, 7$  respectively.

We computed distributions of normalized phase durations for subsequent durations,  
separately for each  $DF$ , and found them to be gamma-like, consistent with previous  
results on subsequent percepts [2, 5, 6]. Herein we report that duration distributions of  
the first percept are also gamma-like (Fig 1C; see also S1 Fig). We used statistical  
bootstrapping to compute the shape parameter  $\alpha$  of each gamma distribution (see  
*Methods*), and determined that  $\alpha \approx 2$  for normalized first durations and  $\alpha \approx 2.6$  for  
subsequent durations. The distributions satisfied the scaling property  $\gamma_1 \approx 2CV$  with  
skewness  $\gamma_1$  and coefficient of variation  $CV \approx 0.7$  and  $CV \approx 0.6$  respectively, similar to  
reports by [24]. For integration, first percept durations were found to be longer in the  
mean than subsequent percept durations (with statistical significance near



equidominance;  $p$ -value of 0.0003 at  $DF=3$  and 0.0184 at  $DF=5$ , right-sided Wilcoxon  
rank-sum test at significance level 5%). Mean durations of first  $I$ -percept were 10.9, 5.3  
and 3.1 s, decreasing with  $DF=3, 5, 7$  ( $p$ -value of 0.0002 when comparing  $DF=3, 5$   
and 0.0014 for  $DF=5, 7$ ). Mean durations of first  $S$ -percept were 3.5, 6.6, 8.1 s  
(comparisons did not produce statistically significant differences, possibly due to fewer  
instances of first  $S$  percepts). For subsequent percepts the means were the following:  
5.4, 3.4, 3.1 s for  $I$  and 4.9, 5.2, 5.6 s for  $S$  at  $DF=3, 5, 7$ , showing a decreasing trend  
for integration between  $DF=3$  and  $DF=5$  or 7.

## B. Auditory streaming as an evidence accumulation process

Herein we propose an evidence accumulation model that accounts for the observed  
dynamical features of buildup and alternations: gamma-like distributions for first and  
subsequent durations,  $DF$ -dependent mean durations, and psychometric buildup  
functions. Data-based [1] estimates of spike counts of neurons in the primary auditory  
cortex (area A1) are sampled by a population of units and their summed responses lead  
to a population vote and to an increment of evidence “for” and “against” the current  
percept. When enough evidence has built up against the current percept, there is a  
switch to the opposite percept. Current increments can be positive or negative but only  
when the accumulated evidence is adequate, does a switch occur.

### B.1. A basic state-dependent model for evidence accumulation

Our EVA model describes activity that accumulates and saturates at a target-level,  $T$ ,  
just-subthreshold. The activity  $X_n$  is updated at the  $n$ th triplet according to:

$$X_{n+1} = X_n + (T - X_n)r + \varepsilon_{n+1} \quad (1)$$

where  $T < 1$  (assuming a unitary threshold) and where  $\varepsilon_{n+1} \sim \mathcal{N}(0, \sigma^2)$  are  
independent random variables (Gaussian noise of zero mean and standard deviation  $\sigma$ ).

The activity increments are state dependent and proportional to the difference  $T - X$ ,  
with constant rate  $r$ . Accordingly, the activity  $X$  drifts towards  $T$  stochastically if  
 $0 < r < 1$ . Accumulation slows with  $X_n$  near  $T$  and the activity can cross the threshold  
only due to noise. At each threshold-crossing  $X_n$  is reset to a value  $X_R$  taken as the  
initial condition for the subsequent dynamics. The time  $D$  between successive threshold  
crossings represents a percept duration; it equals  $N_D$ , the number of triplets between  
threshold crossings multiplied by the onset time from one  $ABA_-$  to the next (500 ms).

Phenomenologically, Eq (1) accounts for the features of the behavioral data  
described in Section A: the observed  $DF$ -dependent mean durations, the gamma-like  
shape of the distributions for first and subsequent durations, and the time course of the  
psychometric buildup. As an example, consider  $DF=5$  and take  $r=0.6$ , which is the  
asymptotic, approximate value of the behavioral buildup, near equidominance (Fig 1C;  
red curve). With initial and resetting conditions  $X_0 = 0.7$  and  $X_R = 0.6$ , and with  
parameter settings  $T = 0.9$ ,  $\sigma = 0.085$ , we simulated Eq (1) 675 times. The computed  
distribution of first *integration* normalized durations and the corresponding  
trial-averaged buildup function (Fig 2; right panels) are in agreement with Fig 1C-D.

To demonstrate the robustness of the model results and dependence on parameter  
values, we simulated Eq (1) with various values for target  $T$  and noise level  $\sigma$ . The  
simulations took into account the latency period during each trial, and the proportion  
of first percepts reported as integration and segregation, during the behavioral  
experiment at  $DF=5$  (as in *Switches and resetting conditions*, in Methods). In this way  
we could assign a “percept”-type identity label to each event between consecutive resets.  
For any fixed  $T$  we found no threshold-crossings when  $\sigma$  was small. Alternations  
between “percepts” occurred only as  $\sigma$  increased, with dominant durations distributed  
as follows (e.g. for first *I*-percept; see Fig 2): normal distributions (region labeled N),  
gamma-like distributions with shape close to that found experimentally (region G) and

exponential distributions (region E), respectively. The values of  $\sigma$  and  $T$  for which numerically generated mean percept durations were within one and two standard deviation(s) of the experimental mean were also calculated (Fig 2; sheets of black dots and gray dots). There is, therefore, a region in the parameter space where critical statistical properties of the behavioral data can be reproduced.

## B.2. Linking neural data with behavioral data in the EVA framework

As in Micheyl et al. [1] we seek to relate perceptual buildup and bistability reported by human subjects during triplet-streaming to animal neural data. Spiking activity evoked by the  $B$ -tone was recorded from tone- $A$ -selective neurons in macaque primary auditory cortex, A1 [1]. At any triplet position in the  $ABA_-$  sequence the mean spike counts,  $m_{DF}$ , decreased with increased  $DF$ . The time course of  $m_{DF}$  exhibited fast adaptation and stabilized by the third triplet [1, Fig.3].

For modeling we assume that individual spike counts are Poisson distributed with means  $m_{DF}$ , and that  $m_3 > m_5 > m_7$  for  $DF=3, 5, 7$ . The responses of A1 neurons will be processed by downstream neurons whose responses at each triplet then feed into the EVA accumulator. Suppose that  $N_{in}$  A1-neurons activate a neuronal unit downstream if the mean input exceeds a threshold  $C_{th}$

$$u = H \left( \frac{1}{N_{in}} \sum_{j=1}^{N_{in}} Spk_j - C_{th} \right) \quad (2)$$

where  $H(\cdot)$  is a Heaviside function. Such a sampler neuron is binary, taking a value  $u$  of 0 or 1 with probabilities  $p$  and  $1 - p$ , for triplets after a brief transient phase of adaptation in A1. In line with the population separation hypothesis [7], when spike counts are large (so  $u=1$ ) we tag the sampler as evidence for integration; likewise when spike counts are small ( $u=0$ ), we tag the sampler as evidence against integration. As  $N_{in}$  increases, the averaged spike count variability around the mean  $m_{DF}$  decreases inversely with  $\sqrt{N_{in}}$  (Fig 3). As such, probabilities  $p_{DF}$  obtained from  $m_{DF}$  at

different  $DF=3, 5, 7$  vary from values being graded (when  $N_{in}$  is small) to values spread apart (when  $N_{in}$  is large), approaching extreme values of zero or one (when  $N_{in}$  is very large); Fig 3. A suitable variability in the A1-neuronal population can be chosen (more about this later in Sections B.4 and C.1) to ensure that probabilities  $p_{DF}$  at  $DF=3, 5, 7$  achieve the graded asymptotic values of the behavioral buildup functions (e.g. 0.45, 0.6, and 0.65 as in Fig 1C). This is an important feature of the EVA model; indeed, without adequate variability in the readout of A1 responses we cannot account for graded BUF levels.

A question remains: How can we link the probability of a sampler unit becoming active stimulated by A1-neurons to the neuronal drive of the accumulator,  $r$  in Eq (1)? We resolve this problem by including an entire layer of binary units  $u$  as above, say  $N_{sl}$  total, and use the percentages  $p_I, p_S$ , as cluster sizes, of active and inactive samplers as input-drive to two accumulators: for and against integration, respectively (Fig 4A). In particular, the output  $p_S$  of the sampler layer (not binary anymore) is a stochastic process with mean  $p$  and variance  $p(1-p)/N_{sl}$  (for justification, see *Statistical properties of SL-activation*, in Methods). Noteworthy, under this construction, the output  $p_S$  of the sampler layer (the input to the accumulator “against integration”) takes indeed values very close to  $r$ , defined as  $p$ , in Eq (1) if  $N_{sl}$  is large enough.

### B.3. The EVA model

Our proposed EVA model is structured as a three-layer network (Fig 4; see details in *Methods*). It takes Poisson spike counts from tone- $A$ -selective A1-neurons (the Input Layer, IL) [1, 7, 8] and passes them through binary units in the Sampler Layer, SL (Fig 4A). Only spike counts recorded during tone  $B$  are included (Fig 4B). Each SL-unit compares the averaged spike count across a small number  $N_{in}$  of input units to a fixed threshold  $C_{th}$  and places the outcome into either state 0 (for  $S$ ) or 1 (for  $I$ ). High activation in IL (above  $C_{th}$ ) is assumed to support percept  $I$  while low activation

facilitates percept  $S$  (Fig 4A-B). The proportions  $p_I(t)$ ,  $p_S(t)$  ( $p_S = 1 - p_I$ ) of SL-units 282  
in states 1 and 0, together with stochastic noise terms  $\xi_I(t)$ ,  $\xi_S(t)$ , modulate the 283  
activity of the Accumulation Layer, ACC (Fig 4C). Two accumulators representing 284  
evidence for the percepts drift towards two targets. Their activities  $x_I$ ,  $x_S$  are updated 285  
at discrete time steps determined by the position  $t$  of each triplet in the  $ABA_{-}$  286  
sequence. One unit accumulates evidence for the current percept (e.g.  $x_I$  during 287  
integration) in the presence of additive “neural” noise defined by a Gaussian process of 288  
strength  $\sigma_I = \sigma_f$ , and approaches target  $T_I = T_f$ . The other accumulator works against 289  
the current percept ( $x_S$  during integration). It experiences stronger noise level  $\sigma_a$ , and 290  
approaches another target,  $T_a$ . Differential noise levels enable the accumulator “against” 291  
to be the first to reach the threshold and initiate the switch; meanwhile, the 292  
accumulator “for” remains confined to a neighborhood of its target. In the deterministic 293  
(noise free) case, alternations between percepts are not possible given that both  $T_a$  and 294  
 $T_f$  are subthreshold targets ( $T_f < T_a < 1$ ), a distinctive feature of our accumulation 295  
model. Instead, the ACC system is bistable with accumulators  $x_I$ ,  $x_S$  reaching either 296  
steady state  $(T_a, T_f)$  or  $(T_f, T_a)$  depending on the initial conditions (Fig 4C, dotted 297  
lines in blue and red). In the presence of noise, however, the accumulator against the 298  
current percept reaches the decision threshold; a switch to the other percept occurs, the 299  
accumulators are reset, the targets are swapped ( $T_S = T_f$ ,  $\sigma_S = \sigma_f$  and  $T_I = T_a$ ,  $\sigma_I = \sigma_a$ ), 300  
then another accumulation cycle begins (Fig 4C, traces for  $x_I$ , solid blue, and  $x_S$ , solid 301  
red; the percept’s type is identified by the background color, blue for  $I$ , red for  $S$ . See 302  
also S2 Fig). It is essential that the accumulators are subjected to noise in order for the 303  
distribution of threshold crossing events idealizing the percept durations to exist. 304

#### B.4. EVA model captures $DF$ -dependence of mean durations 305

Numerical simulations of the EVA model followed the experimental setup with  $N_{tr} = 675$  306  
repetitions (trials) per  $DF$ . The model-generated mean durations were computed 307

separately for each percept type ( $I$ ,  $S$ ; first, subsequent) and  $DF$ . They approximated 308  
well their counterparts from behavioral data (Figs 5B and 6B). They also captured two 309  
important  $DF$ -related trends reported by other studies. First, near equidominance 310  
( $DF=3, 5$ ) mean durations of the first  $I$  percept were found to be longer than those of 311  
subsequent  $I$  percepts [2,6]. Secondly, mean durations for  $I$  and  $S$  showed a 312  
“cross-diagram” like behavior [6, Fig.9B] with equidominance near  $DF=5$ . Mean 313  
durations for  $I$  were greater than mean durations for  $S$  when  $DF$  low ( $DF < 5$ ), and 314  
smaller than mean durations for  $S$  when  $DF$  large ( $DF > 5$ ), results similar to [6]. The 315  
model was robust to noise as demonstrated by 100 Monte Carlo runs of each  $DF$  316  
simulation that yielded consistent results in terms of average values and 95% CI 317  
(Figs 5B and 6B; error bars). 318

In EVA model, the switch to a new accumulation cycle occurred when the ACC-unit 319  
that accumulated evidence against the current percept reached the decision threshold. 320  
Target-against  $T_a$ , noise level  $\sigma_a$ , and increment rate  $p_S(t)$  determined the trajectory of 321  
the suppressed unit  $x_S$  and the length of the corresponding dominant percept  $I$ . 322  
Similarly,  $T_a$ ,  $\sigma_a$  and  $p_I(t)$  determined the duration of percept  $S$ . We studied the effect 323  
of  $T_a$  and  $\sigma_a$  on the model-generated mean durations at each  $DF$  by varying their 324  
values while keeping all other parameters fixed (see *Parameter values used in model* 325  
*simulations*, in Methods). At a given  $T_a$ , EVA model exhibited no alternations if  $\sigma_a$  was 326  
small (Fig 7; region in gray). For moderate  $\sigma_a$  values, perceptual switches occurred but 327  
yielded percepts of mean durations much longer than those found experimentally (in 328  
warm colors); then, for larger  $\sigma_a$ , simulated durations became comparable to (in green) 329  
and then much shorter than (in cool colors) the behavioral mean durations. Similar 330  
results were obtained for  $\sigma_a$  fixed when varying  $T_a$ . As a general rule, the smaller the 331  
target-against, the stronger the noise level had to be in order for the accumulator’s 332  
trajectory to be pushed above the threshold and to generate acceptable statistical 333

approximations of the data (Fig 7, in green; also black dots; within one standard error  
to the experimental mean, SEM).

The decrease in mean durations of  $I$  percepts with increasing  $DF$  (Figs 5B and 6B,  
blue) stemmed from the increase in probability of a sampler to support segregation  
(Fig 8B) which led to an increase of increment rate  $p_S$  of accumulator  $x_S$  (see *Statistical  
properties of SL-activation*, in Methods). The increasing trend of mean durations of  $S$   
percept, with  $DF$ , could also be associated with the decrease of increment rate  $p_I$  of  
accumulator  $x_I$ . These  $DF$ -dependent properties of  $p_S$ ,  $p_I$ , inherited from A1 spike  
counts (Fig 8A) enabled the EVA model to capture the correct qualitative trend of the  
experimental means across all percept-types and  $DF$  conditions. Suitable quantitative  
agreements were then obtained by fine-tuning the value of target-against  $T_a$  (Fig 7, red  
diamond; error between numerical and behavioral results was restricted to 0.1 SEM. See  
also S3 Fig).

### **B.5. EVA-modeled first and subsequent percept durations match observations**

The model reproduces an important statistical feature of the behavioral data, the  
distributions of normalized durations for all first and subsequent  $I$ ,  $S$  percepts at  $DF=$   
3, 5, 7. Histograms were drawn and fitted by gamma probability density functions of  
shape parameters  $\alpha$  (see Eq (3) in Methods) whose values agreed with those from the  
behavioral experiment. The shape of distributions was tested and confirmed statistically  
by 100 Monte Carlo runs of the model for each  $DF$  condition separately (Figs 5B and  
6B; error bars indicate 95% CI around  $\alpha$ -mean values). Exemplar distributions for first  
and subsequent durations are shown in Figs 1D and 6B at  $DF=5$ . For other  $DF$  values,  
see S1 Fig.

Since alternations were caused in the model by the accumulator that gathered  
evidence against the current percept, the distribution of threshold crossing event times

depended on  $T_a$  and  $\sigma_a$ . In particular, for a given  $T_a$ , EVA model generated percept durations that were normally distributed for  $\sigma_a$  small (Fig 7, region N;  $\alpha$  was much bigger than 3) and exponentially distributed for  $\sigma_a$  large (Fig 7, region E;  $\alpha$  was close to 1). For intermediate  $\sigma_a$ , the distributions were gamma-like matching those fit to the observed data (Fig 7, region G; model-generated  $\alpha$  values were similar to those determined from experiments,  $\alpha_{exp}$ , at relative error up to 20-30%). The closer  $T_a$  was to the decision threshold 1, the easier it was to find  $\sigma_a$  that yielded gamma-like distributions. With decreasing  $T_a$ , the transition to a narrower region G was either sharp-edged (e.g.  $DF = 7$ , first  $I$ ) or rather smooth ( $DF = 7$ , first  $S$ ). Percept durations that approximated well both the distribution shape and the mean duration of the experimental data were obtained by using parameters from region G that overlapped with the black dotted sheet.

### **B.6. EVA model captures $DF$ -dependence of stream segregation buildup**

The model-generated buildup functions captured both the rising and the asymptotic phases of the behavioral buildup for each  $DF = 3, 5, 7$  (Fig 1D). These trends were a consequence of already having simulated percept durations and percept means well-fit to behavioral data, in accordance with previous works describing the buildup of stream segregation as a byproduct of an alternating renewal process [17].

### **B.7. Computational advantages of the EVA model**

The model is pseudo-neuromechanistic; it takes A1 responses as input, it allows for attractor-states, and it includes accumulators that are saturating akin to synaptic currents. The spike counts are in accordance with neurophysiological data from A1 [1] and provide input to the computation of perception dominance downstream, as in the conceptual population-separation model of [7] and in competition-based model of [6]. The model incorporates fast habituation (after one triplet or so, Fig 4B) as in [1, Fig.3]



and it accounts for the decrease in response amplitudes and in spatial activity patterns 385  
evoked by tone  $B$  at tone  $A$  tonotopic locations observed as  $DF$  increases [1, 7]. Indeed, 386  
if most of tone- $A$ -selective A1-neurons are active, the model predicts a large proportion 387  
of samplers in SL to be active ( $p_I$  large) and thus favors  $I$  percept. If the opposite 388  
happens and A1 is mostly inactive, a large proportion of samplers are inactive ( $p_S$  is 389  
large) and the model favors  $S$  percept. Activation in IL decreases with larger  $DF$  (fewer 390  
IL-units have mean spike counts above threshold  $C_{th}$ ) and so does  $p_I(t)$ ; Fig 4A-B, 391  
compare  $DF= 3, 5, 7$ ; see also [1, Fig.3] and [7, Fig.11]. This affects the dynamics of 392  
the accumulators since  $x_I(t)$ ,  $x_S(t)$  gather evidence about percepts with increment rates 393  
proportional to  $p_I(t)$ ,  $p_S(t)$  respectively, while also being modulated by a certain level 394  
of noise (Fig 4C, Eqs). 395

The accumulators resemble discrete time versions of the leaky integrate-and-fire 396  
neuron model with conductance-based synaptic input [25],  $dV = (V_R - V)\mathcal{D}dt + noise$ . 397  
The voltage-like variable (here, normalized, by the threshold value for switching) has a 398  
maximum amplitude of one. The reversal potential  $V_R$  is set to either target  $T_a$  or  $T_f$  399  
depending on the type of the dominant percept and the type of the accumulator. The 400  
synaptic drive  $\mathcal{D}$  consists of feedforward input from SL and is analogous to the 401  
reciprocal of the time constant. Finally, Gaussian white noise represents input from 402  
other brain sources or internal to ACC. Its strength  $\sigma$  needs to reach an appropriate 403  
level for the statistics of percept durations generated by the EVA model to match the 404  
behavioral data (see *Methods*). 405

Our EVA model is data-driven. Initial conditions are set using the latency periods 406  
and the proportion of first  $S$ -percepts from the experimental data. Poisson spike counts 407  
of IL neuronal units at each triplet  $t$  and semitone difference  $DF$  are generated using 408  
mean values  $m_{t,DF}$  derived from macaque A1 multi-unit spiking neural data [1] 409  
(Fig 8A). Parameters  $N_{in}$  and  $C_{th}$  are obtained by least-squares fit between the 410

probability of a sampler to support an  $S$  percept and the behavioral buildup at all three 411  
 $DF$  values (Fig 8B; see also *Methods*). Neuronal granularity as a suitable substrate for 412  
perceptual representations [24] is implemented through SL. The number of samplers is 413  
chosen flexibly from a wide range of values ( $N_{sl} \geq 1$ ; here  $N_{sl}=20$ ). There are few other 414  
free parameters,  $T_a$ ,  $\sigma_a$ ,  $T_f$ ,  $\sigma_f$ ,  $b$  (baseline), but only the former two are major players 415  
in fitting the model to data (as shown in Sections B.4 and B.5). 416

## C. Signal detection algorithm yields fast buildup and unrealistic 417 percept durations 418

### C.1. Modeling the buildup with Micheyl's model for auditory streaming 419

The signal detection algorithm of Micheyl et al. [1] (see also [26,27]) has been 420  
extensively cited in the auditory streaming research [3–6,12,21] in regard to computing 421  
time-varying probabilities of stream segregation from neuronal responses in A1. The 422  
model was based on choosing a threshold number,  $C_{th}$ , for mean spike count (first, 423  
trial-averaged; then averaged across sampled neurons) to classify each triplet as  $I$  or  $S$ ; 424  
doing this for each  $ABA_$  in the sound sequence generated a time course, a 425  
“neurometric” function. Briefly, for a given triplet position, a probability distribution 426  
was constructed for the  $B$ -tone responses measured at and convolved over A1 neurons 427  
whose best frequency was that of the  $A$ -tones. The area under the probability 428  
distribution to the right of  $C_{th}$  determined the probability that tone  $B$  was detected 429  
and, consequently, that the triplet belonged to  $I$  percept; the complementary 430  
probability was associated with  $S$  percept. The algorithm classified each triplet 431  
independently and assumed no memory among nearby triplets. 432

A simplified view of this procedure is to consider the distribution of trial-averaged 433  
counts for the neurons as straddling the mean for each triplet in the time course of an 434  
 $ABA_$  sequence [1, Fig.3]. Conceptually, one chooses a level  $C_{th}$  that will cut across 435

the distributions, say for  $DF=3$ , and correspond to low probability of  $S$  for early time 436  
and correspond to the asymptotic level (from behavior) for late time (e.g.  $C_{th}$ , thin 437  
horizontal line, in S4 Fig). This classification could likely provide a decent fit for  $DF=3$  438  
but for  $DF=6$  the spike counts will fall below the threshold, leading to an overestimate 439  
of probability of  $S$ . The remaining cases will yield extreme classifications: for  $DF=1$ , 440  
spike counts for each triplet in the sequence will be above  $C_{th}$  and probability of  $S$  will 441  
be estimated as near zero; for  $DF=9$ , all spike counts will be below  $C_{th}$  (except maybe 442  
for the initial triplet) and therefore probability of  $S$  will be near one for the time course. 443  
The spread of the behavioral time courses in [1, Fig.4], one lying intermediate for  $DF=3$  444  
and the others at very low or quite high levels, provided an opportunity for reasonable 445  
fitting with a single  $C_{th}$  level [1]. For details on numerical fitting with such signal 446  
detection algorithm, see S4 Fig. 447

In the case of our data, the conditions were  $DF= 3, 5, 7$  and the behavioral buildup 448  
functions lay in more intermediate levels and clustered around the asymptotic value of 449  
0.5 (Fig 1C; also Fig 8B, dotted lines). It thus became challenging to fit the buildup 450  
functions (especially the early, slower rising portions for multiple  $DF$  values, 3 and 5 451  
semitones) using Micheyl's model with a unique  $C_{th}$ . 452

We attempted to meet this challenge by applying the signal detection algorithm to 453  
our behavioral data while using interpolated and Poisson distributed spike counts based 454  
on the neural data from [1]. The approach was equivalent to the computation of the 455  
probability of a sampler to support segregation from the EVA model, observing only the 456  
input layer, IL, and passing its output through one single sampler,  $N_{sl}=1$ . While the 457  
mean spike counts over a pool of  $N_{in}$  A1-neurons did not change significantly with  $N_{in}$ , 458  
the standard error to the mean did (Fig 8A). The decrease in the spike count error to 459  
the mean made the horizontal line  $C_{th}$  intersect fewer local distributions and biased the 460  
data-fitting towards the behavioral curve for a certain  $DF$ , at the expense of others. 461

Choosing more A1 neuronal units (larger values of  $N_{in}$ ; Fig 8A) led to larger spread in  
the simulated neurometric functions and poorer fitting (Fig 8B; at  $DF=5, 7$  the  
neurometric functions (solid lines) plateaued at probability approximately 1 after  
triplet-sequence onset, as  $N_{in}$  increased; e.g. case  $N_{in}=100$ ). The best approximation of  
the asymptotic levels of the behavioral buildup for all  $DF$  conditions was found at a  
relatively low  $N_{in}$  however the rising transients of the neurometric functions were still  
much faster than in the experiment.

## C.2. Modeling percept durations with Micheyl's model

We extended the work from [1] by using the signal detection algorithm to generate  
“percepts” and characterize their distributions. For each  $DF$ , adjacent triplets of the  
same type ( $I$  or  $S$ ) were grouped together to create percept phase durations and  
construct frequency graphs (Fig 9). Theoretical calculations showed that subsequent  
percept durations generated by Micheyl's model were exponentially distributed, as  
opposed to gamma-like. During subsequent durations we could assume that the buildup  
functions of stream segregation had reached an asymptotic level  $p$  (Fig 9A-B, upper  
panel) and that the activity in the A1 pool was independent at each triplet. Then the  
probability that percept  $S$  consisted of  $n$ -triplets could be calculated as  
 $Prob(D_S) = p^n(1 - p) = (1 - p)e^{n \ln p}$ , depending exponentially on  $n$ . Likewise the  
probability that  $I$  consisted of  $n$ -triplets was  $Prob(D_I) = p(1 - p)^n = pe^{n \ln(1-p)}$ .  
Similar results were obtained from numerical simulations of Micheyl's model. The  
probability density functions were found to be discrete versions of exponential curves  
and the mean durations were small at about 1 s (Fig 9A-B, middle and lower panels),  
suggesting that the signal detection algorithm is not appropriate to describe perceptual  
alternations and percept durations, key aspects of bistable stream segregation.  
(Compare to Fig 1C; also S1 Fig and [2, 5, 6].)

## Discussion

We developed a new evidence accumulation model for auditory streaming of triplet sequences  $ABA\_ABA\_ \dots$  that takes as input neuronal responses of primary auditory cortex, A1 (macaque, [1]). Our neural-like model accounts for the (human) behavior we observed under three conditions (tone frequency difference,  $DF$ ). During trials, subjects reported spontaneous alternations (bistability) between integration,  $I$ , and segregation,  $S$ . The first percept was usually  $I$ ; the probability of  $S$  built up over time rising from near zero and plateaued within a few seconds to a level that increased with  $DF$ . In the model, switching between  $I$  and  $S$  occurred when noisy accumulation of evidence against the current percept exceeded threshold. Our simulations matched both buildup time-courses and percept-duration distributions.

Our model draws inspiration from the population separation hypothesis of [7] and focuses primarily on the  $B$ -tone responses of  $A$ -tone selective neurons. Micheyl et al [1] used similar principles to compute “neurometric” functions for segregation buildup. Their signal-detection model was applied to A1 and to sub-cortical neuronal spike count data to conclude that perceptual organization of auditory streams was present in early stages of the auditory pathway [3, 21]. It treated each triplet as independent of the previous ones, without an accumulation process from triplet to triplet. The only time dependent mechanism was adaptation of A1 neurons that was nearly complete after 2-3 triplets – too fast to account for buildup. Herein we show that Micheyl’s model behaves as if classification is like coin-tossing with possible bias. Simulated durations are therefore like run-lengths in coin-tossing, exponential-like and very brief, contrary to the observed data (gamma or lognormal-like).

Our approach underscores the essential significance of duration distributions as characterizations of streaming and switching, a constraint overlooked by previous analysis [1]. It emphasizes that neuronal-based modeling of behavioral data that goes

beyond trial-averaged behavior may need to involve an evidence accumulation process in order to account for the statistics of single trials.

## Novel features

Our model is intuitively straightforward. It describes the accumulation of evidence, incremental from each triplet, for or against the current percept. The estimated A1-spike counts are passed through a sampler layer, SL, each of whose units sample a few A1-neurons. SL-units vote 1 or 0 if the summed spike counts for the current triplet are above or below threshold. The fraction  $p_I$  ( $p_S$ ) of sampler-votes 1 (0) represents the net output which favors integration (segregation), transmitted to the accumulators. After multiplicative weighting,  $p_I$ ,  $p_S$  are used together with additive noise to update the accumulators. Of significance, the weighting factor is state dependent, proportional to the difference,  $T-x$ , between the current accumulator value  $x$  and a target  $T$ . Accumulation slows when  $x$  is closer to  $T$  and, importantly, we can choose  $T < 1$  in which case our model mimics noise-driven attractor competition dynamics [23]. Further, if  $T$  is close to one (i.e. accumulation saturates below, near threshold), gamma-like distributed threshold-crossing times are more robustly obtained with modest noise levels [22, 28].

State-dependent dynamics of stochastic accumulators in the framework of bistable perception were highlighted in other previous works [24, 29]. Our approach implements several distinctive features: a link to spike count neural data, an intuitive equation for the accumulator (see Eq 1, basic model for behavior), and a theoretical framework that goes beyond equidominance by looking at graded responses across multiple stimuli conditions.

Our model is a hybrid: it incorporates some neuro-based phenomenology (A1 neuronal responses as input, saturating driving force, escape dynamics) but it is non-committal to specific neuronal mechanisms of inhibition and adaptation. Moreover,

key parameters are not directly linked to neuromechanistic processes but rather  
determined by fitting model dynamics (simulated threshold-passage times) to observed  
duration distributions.

## Duration distributions underlie buildup

Buildup functions (BUFs) for behavioral data are based on trial-averaging of ongoing  
reporting of percepts; the buildup functions can be well-reproduced by an alternating  
renewal process applied to the percept duration distributions [17], in spite of  
disregarding the small inter-duration correlations. Our EVA model, using neural data as  
input, as well reflects a choice process, a neuronal computation, based on single-trials.  
From the EVA-simulated switch times we computed the “percept” duration  
distributions and generated BUFs that compared well with the behavioral data. The  
single-trial percept durations are the critical observations for a model to match in order  
to characterize streaming dynamics for stimuli with constant parameter values such as  
 $DF$ . We conclude that trial-averaging of the spike counts, especially from too early in  
the cortical pathway, and a triplet-based signal detection scheme [1], washes out the  
dynamical aspects of accumulating neuronal computations that underlie perceptual  
multi-stability. Model-based analyses of trial-averaged neuronal responses that show  
ramping behavior in decision-making tasks have recently come under scrutiny by  
consideration of single-trial data [30]. Arguments were made, admittedly still under  
debate [31, 32], that trial-averaged smooth time courses of evidence accumulation during  
decision-making might arise from temporally “discrete steps” rather than from  
continuous ramping dynamics. We suggest that care be exercised when making  
interpretations from trial-averaged neuronal responses, neuronal ramping or neuronal  
BUFs, to consider that such averaging may overlook the discrete event nature of  
perceptual switching and/or decision-making that involve

evidence-accumulation/competition. 563

## Fitting of model to data 564

We assigned different values of noise and targets to “against” and “for” accumulators to ensure switching was caused by the against-unit crossing the decision threshold. 565 566

Intuitively, as the accumulator-against saturates around target-against  $T_a$  (subthreshold), enough noise  $\sigma_a$  guarantees threshold-crossing. The closer  $T_a$  is to one, the less noise is required to produce alternations. Within the switching domain different combinations of  $T_a$  and  $\sigma_a$  yield different distributions and means of percept durations. Our model reproduces the experimental data when  $T_a$ ,  $\sigma_a$  are taken from a restricted parameter region. With  $T_a$  constant across conditions we captured the observed trend of mean durations although some values were off. With fine-tuning of  $T_a$  across conditions (but  $\sigma_a$  constant) we match the observed duration distribution shapes and means. This approach is analogous to obtaining the proper balance between noise and adaptation necessary for alternations in other models for bistable perception [22,33]. Noteworthy, our model shows switching behavior when tuned in other parameter regimes, including with  $T_a > 1$ . However, in such a drift-dominated regime although noise is not needed for alternations, we found that matching the statistical features and behavioral trends required a substantially higher (unacceptable) noise level (not shown here). 567 568 569 570 571 572 573 574 575 576 577 578 579 580

## Comparison with other models 581

Barniv and Nelken (2015) and Cao et al (2016) also modeled auditory bistable perception as evidence accumulation based. The former’s model used Bayesian assignments of  $B$ -tones to either the same class as  $A$ -tones (integration) or to a different class (segregation). Its noise-free version shows periodic alternations, as does our system for  $T_a > 1$ , but the dynamics do not reset. Instead, our accumulators undergo 582 583 584 585 586



discontinuous resetting after each switch. Most importantly, in contrast to [5], the parameters in our model are interpretable, functionally if not physiologically. Cao et al. formulated a stochastic accumulator that reproduced (like ours) several properties of bistable behavior but without a description of switching and of, possibly asymmetric, alternations. Our work differs from both models by incorporating directly A1-spiking data as input. In this sense it is more akin to [6], a literal competition model. Notably, our approach predicts that neuronal computation for percept representation and evidence accumulation takes place beyond A1; its input (activity from A1 devoid of switch-dynamics) implicitly includes inhibition, adaptation and noise that occur within A1 and preceding stages.

Dynamic competition models commonly include two or more units representing response patterns associated with different percepts, and share mechanistic features of mutual inhibition, adaptation, and noise [6, 14]. In our two-process model only one percept is currently dominant thereby realizing mutual exclusivity. However, inhibition is not explicitly invoked; rather, our model performs as if a firm choice is made at the switch time, further accumulation of evidence in favor of the fresh percept is prevented; the in-favor accumulator is reset and targeted to a low value,  $T_f$ , despite continued incoming evidence from SL.

In oscillator-based alternations, switching may be determined by strongly rising adaptation in the dominant unit, leading to “release” from inhibition, or by stronger recovery from adaptation in the suppressed unit, leading to “escape” from inhibition [34–37]. Our model has no explicit adaptation variable as negative feedback. However, the accumulation of evidence against the current percept may be viewed as recovery of salience of the non-dominant percept. The rise and eventual take-over of dominance is therefore analogous to the escape from suppression in competition models.

In such models if adaptation is weak, changes in dominance may be represented by

noise-driven switches between stable states in attractor state dynamics [22, 23]. These 613  
insights motivated our choice of an evidence-against accumulator that saturates 614  
just-subthreshold. Dominance durations are longer with reduced noise, and no switches 615  
occur in the noise-free idealization. Further, gamma-like duration distributions are more 616  
robustly obtainable with this mechanism: rise to saturation and wait for switch-favoring 617  
fluctuations to induce a switch. Satisfactory results are also obtainable with  $T_a > 1$ , but 618  
if  $T_a$  exceeds threshold by too much, acceptable duration statistics seemed to require 619  
strong noise, and accumulator time courses were noise-dominated. 620

Bistable perception for ambiguous visual displays was modeled by [38] as a 621  
continuous time accumulation of binary (bistable) units becoming active with 622  
state-dependent transition rates between the active and inactive states. Our modeling 623  
shares a key feature: saturation to a level that strongly affects the percept durations; 624  
saturation near/below threshold underlies escape-like dynamics with gamma-like 625  
duration distributions. Distinguishing from [38], our model is event-based 626  
(discrete-time) with stimuli-induced positive increments and additive zero-mean noise 627  
that allow positive/negative increments, not a Markov model. It is applied directly to 628  
the neural data and includes saturation with noise-driven attractor dynamics as in 629  
competition models. 630

## Limitations, extensions, predictions 631

Reports on triplet-streaming are conflicted about correlations between successive  $I$ ,  $S$  632  
durations, showing either statistical independence [2] or small positive correlations [5]. 633  
In our model both accumulators are reset after a switch approximately to target  $T_f$  so 634  
correlation between successive percepts is weak. However, we could likely match the 635  
reported correlations [5] by changing the resetting to generate continuous dynamics of 636  
accumulators. 637

Alternations between percepts are generated by the evidence that accumulates  
against the current percept. Its dynamics depends primarily on the distance to target  
 $T_a$  and on input  $p$  from the sampler layer, with  $T_a$  assumed relatively constant across  
conditions. Alternatively, one might choose  $T_a$  as a  $DF$ -dependent parameter and keep  
 $p$  unchanged. Such an approach suggests an interpretation of the target, with nearness  
to threshold, reflecting a combination of condition-dependent input and inhibition, and  
possibly excitation (in-line with a population separation hypothesis [7]). Then  $p$ , as  
constant and independent of  $DF$ , can be viewed as rate of recovery from adaptation.  
However, to establish a derivable connection between  $T_a$  and the experimental condition  
and A1 spiking activity presents challenges.

In our model the number of A1 neurons that are sampled by each SL-unit is much  
lower than the number of recorded units used in the signal detection approach in [1]  
( $N_{in}=5$  vs 91 cortical neurons). We found that the granularity of sampling A1 by a unit  
in the sampler layer is important in order to preserve sufficient variability in the  
averaged spike count over trials and thereby obtain graded BUFs across different DF  
conditions. Perhaps the constraint on  $N_{in}$  derives from our assumption of statistically  
independent A1 neurons. As shown by [27], trial-to-trial variability in spike counts for  
 $N_{in}$  small, if spikes are statistically independent, is equivalent to the variability over a  
much higher number of A1 neurons if correlations exist within the pool. We did not have  
access to the original spike times from [1] to verify this hypothesis; we only extracted  
mean spike counts from the published data. However, this observation is supported by a  
subsequent study by Micheyl et al [12] and could be explored in future simulations;  
when spike counts from a subset of 30 cortical neurons (or even just one neuron) out of  
91 were analyzed with the signal-detection model, the resulting neuronal-based BUFs  
were less widely spread across conditions, matching the graded behavioral BUFs from a  
different subject pool (see [12, Fig.5], compare with Figs 3 and 8 for our model).

Our model could be extended to mimic the transient behavior of buildup by relaxing  
the constraints on initial conditions and treating the baseline as  $DF$ -dependent. Two  
hypotheses may be tested: that integration emerges with first percept probability as in  
the behavioral data and that early adaptation of A1-responses accounts for longer first,  
than subsequent,  $I$ -durations [39].

With minimal modifications to our model we could test for behavior at other  $DF$   
values or for dependence on presentation rate. Assuming lower target-against levels  $T_a$   
for faster presentations, we predict at constant  $DF$  similar mean  $I$ -durations but longer  
 $S$ -durations, and higher probability of segregation [6]. With increased presentation rate  
mean spike counts for  $B$ -tones will decrease [8] and lead to lower vote counts  $p_I$  and  
lower effective accumulation rate,  $T_a p_I$ . Although  $p_S (=1-p_I)$  would increase, the  
increase would be compensated by the decreased  $T_a$  leaving  $T_a p_S$  relatively unchanged.

To conclude, we propose an evidence accumulation model for auditory bistable  
perception with neurally-plausible mechanisms that accounts for statistics of behavioral  
data. In principle, it could be extended to study dynamics induced by transient  
perturbations (deviants/distractors; [39]) or associated with multiple percepts [14];  
implementations of such generalizations remain as open topics for future research.

## Methods

### Experimental design and statistical analyses

#### Participants

Fifteen human subjects with normal hearing (8 female and 7 male; ages 18-45 yrs.;  
median 22 yrs.) were included in the behavioral study. They listened to sequences of  
repeating  $ABA$ - triplets and were instructed to continuously report their ongoing  
percept by selectively pressing one of two different buttons on a keypad. Subjects began

reporting their percept typically 2 s after stimulus onset as integration ( $I$ ; a single, 688  
coherent stream, the galloping pattern  $ABA\_ABA\_$ ) or segregation ( $S$ ; two 689  
simultaneous distinct streams  $A\_A\_A\_A\_$  and  $\_B\_ \_ \_ B\_$ ); Fig 1 A-B. 690

## Stimuli 691

Stimuli were 30-s long sequences of triplets  $ABA\_$  that consisted of alternating high ( $A$ ) 692  
and low ( $B$ ) pure tones gated with 10 ms raised cosine ramps and followed by a 125 ms 693  
silent pause “\_”; Fig 1A. In total, triplets were 500-ms in duration and were repeated 694  
60 times per trial. Tones were separated in frequency by  $DF$  semitones chosen from 695  
three conditions ( $DF= 3, 5, 7$ ) with each condition being presented five times per 696  
experimental block. To prevent habituation to a certain frequency, for each  $DF$  the 697  
tones were generated by roving through variants of frequencies taken 0,  $\pm 1$  or  $\pm 2$  698  
semitones apart from their geometric mean (middle pair in the list below); see also [4]. 699  
Frequencies ( $f_A, f_B$ ), in Hz, were chosen as: (494, 415), (523, 440), (554, 466), (587, 494) 700  
or (622, 523) Hz at  $DF=3$ ; (523, 392), (554, 415), (587, 440), (622, 466), (659, 494) at 701  
 $DF=5$ ; and (554, 370), (587, 392), (622, 415), (659, 440), (698, 466) at  $DF=7$ . Stimuli 702  
were digitally generated in Matlab at 48 kHz sampling rate and were delivered through 703  
earphones in a soundproof isolated room. Subjects had the sound volume adjusted to 704  
their comfortable hearing level. 705

## Experimental protocol 706

Each subject performed 9 experimental blocks. Each  $DF$  condition was randomly 707  
presented 5 times per experimental block, using different combinations of frequencies for 708  
tones  $A$  and  $B$ , without repetition (see *Stimuli*). A Latin square design was used to 709  
determine the order of presentation of each condition in each block. This resulted in 710  
group data with 675 30-s trials for each of three  $DF$  values. The frequency separation 711  
values ( $DF= 3, 5, 7$ ) were chosen to fall within the range of ambiguity of the van 712

Noorden diagram in which listeners can perceive both integration and segregation [10, 40]. All subjects underwent a training session in which they were given verbal explanations and auditory illustrations of the two possible percepts, and they practiced distinguishing between them. Then, during the recording session, listeners were instructed to press and hold one key on a keypad when they perceived stimuli as  $I$ , and to release it while pressing another key when they perceived stimuli as  $S$ , and so on. They were encouraged to respond as soon as they heard the change in percept. The key-response data were converted to binary vectors with value 0 assigned to  $I$  (and to the latency period defined as the time before identification of either percept) and 1 to  $S$ , for further analysis. Experiments were performed in a dedicated soundproof booth in the Human Brain Research Laboratory, Neurosurgery Department at The University of Iowa. Written informed consent was obtained from all subjects. Research protocols were approved by the University of Iowa Institutional Review Board.

### Build-up functions and the latency period

The time course of  $S$  percept after stimulus onset was computed from key-pressed data, 0 for  $I$  and 1 for  $S$ . Those were sampled at 1 ms to create vectors of binary values corresponding to appropriate percept type at a particular time instance. At each  $DF$  condition, binary vectors were averaged across 675 trials to obtain the build-up function of  $S$ ; bootstrapping was also used to compute the 95% confidence interval (CI) around the mean (Fig 1 B-C). The time course of  $I$  was computed with the same procedure but over key-pressed data labeled as 1 for  $I$  and 0 for  $S$ . At a particular time  $t$ , the proportion of trials classified as  $I$ ,  $S$  or neither (during the latency period/the first few seconds after stimulus onset) were  $p_{int}(t)$ ,  $p_{seg}(t)$  and  $p_{Lat}(t)$ , and summed up to  $p_{int}(t) + p_{seg}(t) + p_{Lat}(t) = 1$ . The first percepts were typically  $I$ . However, for larger values of tone frequency separation, subjects tended to report  $S$  as first percept more often which led to an increase in  $p_{seg}(t)$ .

## First durations and subsequent durations

All complete percept durations across trials and conditions were included in the behavioral analysis. Unfinished percepts and button presses recorded after the end of stimulus presentation were discarded. For each  $DF=3, 5, 7$ , the statistics was evaluated over four subsets of data, separately: first  $I$ , first  $S$ , subsequent  $I$  and subsequent  $S$ . For each  $DF$  and each of these four percept types, the mean dominance duration was computed in two steps: first, it was computed per subject, say  $\mu_i$  for subject  $i = 1, \dots, 15$ ; then the mean duration  $\mu$  of the group data was defined (and reported) as the unweighted average across all subjects,  $\mu = (\mu_1 + \mu_2 + \dots + \mu_{15})/15$  (e.g. Fig 1C; mean  $\mu$  is shown for first duration distributions at  $DF=5$ ). By this approach, any potential bias of the calculation towards fast switchers who might contribute more durations to the pool and concurrently spend less time in a particular percept, was mitigated. Error bars at 95% CI of the mean were also determined; error bars corresponded to 1.96 SE; standard error  $SE = std_{exp}/\sqrt{15}$  was computed from the standard deviation  $std_{exp}$  over the group of means  $\mu_i$ . For analysis of grouped data we used subject-specific normalized (by individual subject mean) percept durations as follows: at each  $DF$  condition and each percept type (first/subsequent,  $I/S$ ), any raw percept duration  $D$  of subject  $i$  was normalized by the corresponding mean  $\mu_i$  to  $\tilde{D} = D/\mu_i$ . Histograms of normalized phase durations  $\tilde{D}$  for each  $DF$  condition and percept type were computed and fit by gamma distributions with density functions

$$f(\tilde{D}|\alpha, \tilde{\mu}) = \frac{\alpha/\tilde{\mu}}{\Gamma(\alpha)} \left( \alpha\tilde{D}/\tilde{\mu} \right)^{\alpha-1} e^{-\alpha\tilde{D}/\tilde{\mu}}, \quad \tilde{\mu} \approx 1. \quad (3)$$

Mean  $\tilde{\mu}$  was well-fit to 1 due to normalization. Then the coefficient of variation  $CV = 1/\sqrt{\alpha}$  and the skewness  $\gamma_1 = 2/\sqrt{\alpha}$  depended exclusively on the shape parameter  $\alpha$ . If  $\alpha$  was large then (3) was equivalent to a normal distribution. If  $\alpha \approx 1$  then (3) was equivalent to an exponential distribution. On the other hand, for  $\alpha \approx 2$  (as observed for first durations in behavioral data) and  $\alpha \approx 2.6$  (as observed for subsequent

durations), the distributions satisfied the scaling property  $\gamma_1 = 2CV$  with  $CV \approx 0.7$  and  $CV \approx 0.6$  respectively. The latter case was similar to the findings of [24] that described the statistics of percept durations for other examples of perceptual bistability.

### Distribution testing of phase durations

The fitting of the experimental (and numerical) data was obtained by calculating the values of  $\alpha$  and  $\tilde{\mu}$  with the Maximum Likelihood Estimation (MLE) algorithm. The goal was to determine  $\alpha$  and  $\tilde{\mu}$  that yielded the maximum product  $\prod_k y_k$  of all  $y_k$  gamma-likelihood values of the normalized percepts  $\tilde{D}_k$  counted by index  $k$  for each run of the experiment. This was equivalent to maximizing the log-likelihood  $LL = \ln \prod_k y_k = \sum_k \ln y_k = \sum_k \left( (\alpha - 1) \ln \tilde{D}_k - \frac{\alpha}{\tilde{\mu}} \tilde{D}_k + \alpha \ln \frac{\alpha}{\tilde{\mu}} - \ln \Gamma(\alpha) \right)$  based on formula (3). The optimization of  $LL$  was implemented numerically with MATLAB function `fminsearch`. Distribution testing on normalized durations was done by statistical bootstrapping. We generated 10000 bootstrapping sets of gamma distributions with fitted parameters  $\alpha$  and  $\tilde{\mu}$  and constructed the distribution of maximum log likelihood values for those sets. The test statistics  $LL$  was compared to this distribution to obtain the probability of log likelihood to be less than  $LL$  (the  $p$ -value). The normalized durations were well fit by a gamma distribution with the optimal values  $\alpha$  and  $\tilde{\mu}$  (as null hypothesis) at significance level 0.05 if  $p$ -value  $\geq 0.05$ .

### Statistical analysis of model-generated data

The histograms of first and subsequent durations  $I$  and  $S$  in trials generated by the model (see below), and their fitting by gamma distributions, were computed in a similar manner as for the experimental data. Likewise, build-up functions for the model were constructed as those for the behavioral data.



## The evidence accumulation model

787

Our proposed EVA model is a feedforward network of 3 layers: the input layer of 788  
spiking units, the sampler layer of binary response units, and the accumulation layer of 789  
two accumulators. The time-unit of the model is discrete and defined as the position of 790  
the triplet in the auditory sequence. Every  $DF$ -dependent numerical simulation of the 791  
EVA model consisted of  $N_{tr}=675$  repetitions (trials) to mimic the setup from the 792  
behavioral experiment. The trials were then used to generate the statistics of the 793  
percept durations in terms of mean values, shape of distributions, and buildup functions. 794  
Finally, in order to test for the model's robustness in the presence of noise (not for 795  
sensitivity to model parameter values), this numerical procedure was run 100 times for 796  
each  $DF=3, 5, 7$  condition separately, and the results were characterized by averaged 797  
values and their 95% CI. 798

### Input layer (IL)

799

The IL-units were assumed to be tone- $A$  selective neurons from primary auditory cortex 800  
(A1) as described in [1]. The averaged (over trials) spike counts  $m_{t,DF}$  of the IL-units 801  
were derived from data (see section *Data-driven parameters for EVA model*) and 802  
depended on the position  $t$  of the triplet in the  $ABA_-$  sequence ( $t=1, \dots, 60$  for a 803  
60-triplet long stimulus; 30 s in duration) and on the semitone difference  $DF$ . The 804  
model was simplified by focusing only on the spike counts during the  $B$ -tone 805  
presentation at  $A$ -tone selective neurons in A1. As reported by multi-unit recordings in 806  
monkeys, such A1-neurons adapted strongly and rapidly during presentation of 807  
triplet-repeating auditory sequences [1, total of 91 neurons]. Temporal correlations 808  
between the means of an A1-neuron from triplet to triplet were captured in the model 809  
by the trend of  $m_{t,DF}$  that decreased exponentially with  $t$  (Fig 4B). Trial-to-trial 810  
variability of the dynamics of IL units as well as unit variability in IL during a single 811

trial were implemented using Poisson point processes. (We used this approach because 812  
we could extract mean spike counts from published data of [1] but did not have access 813  
to the original spike times.) For an A1-neuron with mean spike count  $\lambda = m_{t,DF}$  we 814  
supposed that its instantaneous spike count  $k$  ( $k = 0, 1, 2, \dots$ ) at triplet  $t$  and condition 815  
 $DF$ , was randomly generated from a Poisson distribution with probability 816  
 $P(X = k) = \lambda^k e^{-\lambda} / k!$ . The Poisson spike counts are generated independently for each 817  
neuronal unit in IL, each triplet and each semitone difference condition. Note that the 818  
model could be generalized by assuming neuronal heterogeneity, with averaged spike 819  
counts  $m_{t,DF}^j$  at neuron  $j$  chosen from a normal distribution  $\mathcal{N}(m_{t,DF}, s_{t,DF})$  of mean 820  
 $m_{t,DF}$  and standard deviation  $s_{t,DF}$  derived from [1]. However, the impact of 821  
heterogeneity on the model's outcome would be negligible given that EVA model was 822  
formulated to use mean spike counts over IL neuronal pools as input rather than mean 823  
spike counts of individual neurons (see below). 824

### Sampler layer (SL) 825

The SL-units were tasked with summing and classifying spike counts from subsets of 826  
 $N_{in}$  IL units (A1-neurons). Consider that a trial of length  $N_t$  ( $N_t=60$  triplets) during a 827  
certain  $DF$  condition was simulated by EVA model: each sampler summed the input of 828  
a pool of  $N_{in}$  neuronal units from IL; weighted by  $N_{in}$ , this gave the mean spike count 829  
for  $B$ -tones of the corresponding pool of  $A$ -tone selective A1-neurons, 830  
 $\bar{X}_t = (\sum_{j=1}^{N_{in}} X_t^{(j)}) / N_{in}$  for triplet  $t$ ; then  $\bar{X}_t$  was compared to a  $DF$ -independent, fixed, 831  
neuronal threshold  $C_{th}$ . If the averaged spike count was large ( $\bar{X}_t \geq C_{th}$ ) then the 832  
subset activity was high and the pool was assumed to support, for this triplet, the 833  
integration percept  $I$ . The sampler's response at triplet  $t$  was classified as "1". If the 834  
averaged spike count was small ( $\bar{X}_t < C_{th}$ ), the subset activity was low and the IL-pool 835  
was said to support the segregation percept  $S$ . The sampler's response was classified as 836  
"0" (Fig 4A). Therefore, at each triplet  $t$ , each sampler behaved like a biased coin being 837

flipped with probabilities  $p_{0;t,DF}$  and  $p_{1;t,DF}$  over the binary probability space of 0 and 838  
1. Since neuronal units in each IL-pool followed independent Poisson distributions of 839  
parameters  $m_{t,DF}$ , the pool itself was also a Poisson process defined by the product 840  
 $N_{in} m_{t,DF}$ . Then, the samplers were binary signal detectors with probabilities 841

$$p_{0;t,DF} = Prob(\bar{X}_t < C_{th}) = \sum_{0 \leq k < C_{th} N_{in}} \frac{(N_{in} m_{t,DF})^k e^{-N_{in} m_{t,DF}}}{k!} \quad (4)$$

and  $p_{1;t,DF} = 1 - p_{0;t,DF}$  calculated over 675 repetitions of the model in order to 842  
maintain similarities to the behavioral experiment, and with expected value and 843  
variance  $E[\bar{X}_t] = p_{1;t,DF}$  and  $Var[\bar{X}_t] = p_{1;t,DF} (1 - p_{1;t,DF})$ . 844

Three  $DF$ -independent parameters were associated with SL:  $N_{in}$ , the number of A1 845  
inputs to a sampler unit;  $C_{th}$ , the neuronal counting threshold that categorizes 846  
ensemble activity in A1 as high (class 1) or low (class 0); and  $N_{sl}$ , the number of 847  
neuronal units in SL. The values of  $N_{in}$  and  $C_{th}$  were obtained by least-squares fit 848  
between probabilities  $p_{0;t,DF}$  and the “asymptotic” levels 0.45, 0.6, 0.65 of the 849  
psychometric buildup functions (last 15 seconds of trial duration) for all  $DF = 3, 5, 7$  850  
(Fig 8B; also section *Data-driven parameters for EVA model*). The psychometric 851  
buildup represented the fraction (over the trials) of the segregation percept  $S$  reported 852  
by all subjects at each time point and  $DF$  during the 30-s long trial. Through this 853  
optimization procedure (Fig 8B; optimal values obtained for  $N_{in} = 5$ ,  $C_{th} = 4.21$ ) 854  
probabilities  $p_{0;t,DF}$  of a sampler to be in a state that supported percept  $S$  were 855  
estimated – at least for triplets several seconds from the stimulus onset – as 856

$$p_{0;t,DF} \approx p_{seg;DF} = 0.4, 0.6, 0.75 \quad \text{at} \quad DF = 3, 5, 7. \quad (5)$$

The inclusion of the sampler layer in the model ( $N_{sl} > 1$ ) ensured neuronal granularity 857  
that was found by other studies to be a suitable substrate for perceptual 858  
representations [24]. In particular, at each triplet  $t$ , some of the  $N_{sl}$  samplers were in 859  
class 0 showing low A1 spiking and thereby associated with segregation [1, 7] while 860

others were in class 1 supporting integration. The percentages  $p_S(t)$  and  $p_I(t) = 1 - p_S(t)$  of such samplers were taken herein as stochastic (over trials) output of SL (Fig 4A).

### Accumulation layer (ACC)

The accumulation layer consisted of two units whose dynamic states  $x_I$  and  $x_S$  changed from triplet to triplet according to Eqs

$$\begin{aligned}x_I(t+1) &= x_I(t) + (T_I - x_I(t))p_I(t) + \sigma_I\xi_I(t), \\x_S(t+1) &= x_S(t) + (T_S - x_S(t))p_S(t) + \sigma_S\xi_S(t).\end{aligned}\tag{6}$$

The accumulator for  $x_I$  gathered evidence that favored integration (through input  $p_I(t)$  from SL) while the accumulator for  $x_S$  gathered evidence that favored segregation (through input  $p_S(t)$  from SL). Importantly, their states were influenced by the perceptual context as well (Fig 4C, solid lines in blue and red illustrated traces for  $x_I$  and  $x_S$ ; the background color showed the percept's type, blue for  $I$  and red for  $S$ ). In particular, if *segregation* was the current dominant percept then  $x_I$  accumulated evidence *against* segregation and aimed to reach target  $T_I=T_a$ ; simultaneously,  $x_S$  accumulated evidence *for* the current percept and it drifted instead towards target  $T_S=T_f$ . Discrete-time Gaussian white noise processes  $\sigma_I\xi_I(t)$ ,  $\sigma_S\xi_S(t)$  with zero mean and standard deviations  $\sigma_I=\sigma_a$  and  $\sigma_S=\sigma_f$ , interacted with the stochastic inputs from SL to produce certain levels of fluctuations. The additive stochastic terms in ACC were target-dependent with  $\sigma_a > \sigma_f$  for  $T_a > T_f$  (Fig 4C). On the contrary, if the current percept was integration then  $x_I$  accumulated evidence for  $I$  and approached  $T_I=T_f$  while  $x_S$  accumulated evidence against  $I$  and approached  $T_S=T_a$ . The level of local noise was adjusted accordingly to values  $\sigma_I=\sigma_f$  and  $\sigma_S=\sigma_a$ .

## Switches and resetting conditions

In the experiment, subjects identified the dominant percept by pressing a certain button on the keypad. Equivalently, in EVA model, the switch from one dominant percept to the next occurred when either  $x_I(t)$  or  $x_S(t)$  crossed the ACC threshold set to 1. Herein, the alternations were initiated by the accumulator that observed how many samplers in SL opposed the current percept at each triplet  $t$ . Its trace was attracted to target  $T_a$  that lay near the threshold, then was pushed across the threshold by the noise of strength  $\sigma_a$ . In the meantime, the accumulator in favor of the current percept hovered around  $T_f$  with fluctuations set by  $\sigma_f$ . For example during percept  $I$ , accumulator  $x_S$  was the first to reach threshold 1 producing a switch to percept  $S$ ; then, during  $S$ ,  $x_I$  reached threshold 1 leading to another switch to subsequent percept  $I$ , and so on (Fig 4C). At every change in percept, the accumulators were reset to new levels  $x_I^+$ ,  $x_S^+$ . These were defined as  $x_*^-$  where  $x_*^-$  was the value that the evidence-for accumulator  $x_*$  ( $* = I, S$  during current percept  $I, S$  respectively) reached just before the switch.

The simulations took into account the proportion of first percepts reported as segregation at each  $DF$  during the behavioral experiment as well as the latency period during each trial. The initial conditions of the accumulators were set to a  $DF$ -independent baseline value  $b$  and kept constant during the entire latency period (calculated in length of  $T_{Lat}$  triplets) of any given trial. We defined  $x_I(t) = x_S(t) = b$  for all triplets  $t$  between 1 and  $T_{Lat}$ ; then at  $t = T_{Lat}$  the type of the current first percept,  $I$  or  $S$ , was imported from the behavioral data; the dynamics of the accumulators for  $t \geq T_{Lat}$  were then determined according to Eqs (6) and the associated reset conditions.

The choice of parameters ( $\sigma_f$  small) and of reset conditions ( $x_a^+ = x_f^+ = x_f^-$  where  $x_a, x_f$  are accumulators “against” and “for” the dominant percept) ensured that the switch was triggered by the dynamics of  $x_a$ . Rare events when  $x_f$  might have crossed the threshold ahead of  $x_a$  were disregarded. Another possible implementation of

resetting would allow for correlations between consecutive percepts; it could depend on  
each accumulator state just before a switch, a simple interchange of roles such that  
ACC variables remained continuous,  $x_f^+ = x_a^- = 1$ ,  $x_a^+ = x_f^-$  (not shown in this paper).

## Model analysis

### Parameter values used in model simulations

All figures for the full EVA model (Figs 1, 4 – 8, and S1 Fig – S3 Fig, S5 Fig), were  
generated with the following parameter values:

$$N_{in} = 5, C_{th} = 4.21, N_{sl} = 20, b = 0.7, T_f = 0.6, \sigma_a = 0.085, \sigma_f = 0.03$$

and decision threshold  $\theta = 1$ , unless otherwise stated in their caption. (For parameter  
values  $m_{t,DF}$  associated with IL, see *Data-driven parameters for EVA model*.) Target  
 $T_a$  was initially chosen equal to 0.9 and then was fine-tuned to best fit the mean  
dominance durations of the first and subsequent integration and segregation percepts  
from the behavioral data – within  $\pm 10\%$  standard error (SE) of the experimental mean  
values (Figs 5 and 6; also S5 Fig). Its values changed with  $DF$ , and with classification  
(first or subsequent) and type ( $I$  or  $S$ ) of the percept. We used the notation  $T_{aI1}$  for  
“target against integration, first percept”,  $T_{aS1}$  for “target against segregation, first  
percept”,  $T_{aI2}$  for “target against integration, subsequent percepts”, and  $T_{aS2}$  for  
“target against segregation, subsequent percepts”, respectively. Therefore, in the model,  
whenever acting as target-against,  $T_S = T_{aI1}$  or  $T_{aI2}$  while  $T_I = T_{aS1}$  or  $T_{aS2}$ . In  
simulations we used the following values (see red diamonds in Fig 7):

$$\text{At } DF=3: T_{aI1} = 0.8273, T_{aS1} = 0.9273, T_{aI2} = 0.8924, T_{aS2} = 0.8924;$$

$$\text{At } DF=5: T_{aI1} = 0.9000, T_{aS1} = 0.8909, T_{aI2} = 0.9288, T_{aS2} = 0.9106;$$

$$\text{At } DF=7: T_{aI1} = 0.9348, T_{aS1} = 0.8773, T_{aI2} = 0.9242, T_{aS2} = 0.9318.$$

### Selection of target-against $T_a$ values

931

The mean duration  $\mu$  obtained by numerical simulations of EVA model was compared  
to its behavioral counterpart  $\mu_{exp}$  for first and subsequent  $I$ ,  $S$  percepts, and each  
 $DF=3, 5, 7$ . Behavioral results from 15 subjects were characterized by group mean  
data  $\mu_{exp}$  and 95% CI with CI corresponding to 1.96 SE (Fig 5A and Fig 6A, lower  
panel). Then the model was considered to provide a good approximation of the  
experimental data if  $\mu$  belonged to a narrow band within 1 SE from  $\mu_{exp}$  (Fig 7, green  
region and black dots). This was equivalent to the relative error  
 $|\mu/\mu_{exp} - 1| \leq CV/\sqrt{15}$  where  $CV = std_{exp}/\mu_{exp}$  was the coefficient of variation  
computed over the group of subjects. Parameters  $T_a, \sigma_a$  used for the numerical  
simulations of EVA model (Fig 7, red diamond) were chosen as follows:  $\sigma_a = 0.085$  was  
kept fixed while values of  $T_a$  were determined by restricting the error magnitude to only  
10% SE (i.e.  $|\mu - \mu_{exp}| \leq 0.1$  SE); then, among the latter set we selected the value  $T_a$   
that yielded the least error in shape of the gamma-fit distributions (see Eq (3)).

932

933

934

935

936

937

938

939

940

941

942

943

944

### Statistical properties of SL-activation

945

At any fixed triplet position  $t$  in the  $ABA_-$  sequence presentation, each of the  $N_{sl}$   
samplers was equivalent to an independent Bernoulli process (during repeated trials)  
with probability of success  $p_{1;t,DF}$  and probability of failure  $p_{0;t,DF} = 1 - p_{1;t,DF}$ .  
Likewise, the state of SL described a binomial process equivalent to the random  
variable, over trials,  $N_{sl} p_I(t)$  where  $p_I(t)$  represented the percentage of samplers in  
class 1 that favored integration at triplet  $t$ . The stochastic process had mean  $N_{sl} p_{1;t,DF}$   
and variance  $N_{sl} (1 - p_{1;t,DF}) p_{1;t,DF}$ . As a result, the first two moments of the output  
 $p_S(t)$  and  $p_I(t)$  of SL were well-approximated, for sufficiently large triplet-indexes

946

947

948

949

950

951

952

953

( $t \geq 30$ ; see Eq (5) and Fig 8B, 2nd panel), by

$$\begin{aligned} E[p_S(t)] &= p_{seg;DF}, & E[p_I(t)] &= 1 - p_{seg;DF}, \\ Var[p_S(t)] &= Var[p_I(t)] = \frac{1}{N_{sl}} (1 - p_{seg;DF}) p_{seg;DF}. \end{aligned} \quad (7)$$

In particular, for large  $N_{sl}$  the variance of  $p_S(t)$  and  $p_I(t)$  became negligible while their means remained unchanged.

### Selection of noise level $\sigma_a$

Our EVA model features accumulation that could saturate, given that target-against  $T_a$  was assumed to be subthreshold ( $T_a < 1$ ). Hence the noise level  $\sigma_a$  has to be sufficiently large in order for the trajectory of the accumulator drifting towards  $T_a$  to reach the ACC-threshold. A theoretical lower-bound estimate for  $\sigma_a$  was obtained by assuming  $N_{sl}$  large and focusing only on the properties of the subsequent percept durations.

Under such assumptions,  $p_S(t)$  and  $p_I(t)$  were approximately constant as demonstrated by Eqs (5) and (7). Then, after each switch, both accumulators satisfied an equation of the form  $X_{n+1} = X_n + (T - X_n)p + \varepsilon_{n+1}$  with  $X_0 \approx T_f$ ;  $T$ ,  $\sigma$  taken as either  $T_a$ ,  $\sigma_a$  or  $T_f$ ,  $\sigma_f$ ; and independent random variables  $\varepsilon_{n+1} \sim \mathcal{N}(0, \sigma^2)$ ; see also Eq 1 in Section

B.1. Such an equation describes a stationary first order autoregressive model with parameter  $\lambda=1-p$  [41]. Therefore, at the  $n$ th triplet during a percept immediately

following a switch, the states of the accumulators followed a normal distribution with mean  $E[X_n]=T-(T-T_f)\lambda^n$  and variance  $Var[X_n]=\sigma^2(1-\lambda^{2n})/(1-\lambda^2)$ . In particular,

at the  $n$ th triplet during integration, the mean and variance of  $x_S$  ( $x_I$ ) that

accumulated evidence against (for) the percept were  $E[x_S] = E_a$ ,  $Var[x_S] = V_a$ ,

$E[x_I] = E_f$ ,  $Var[x_I] = V_f$  where

$$E_a = T_a - (T_a - T_f)p^n, \quad V_a = \frac{1 - p^{2n}}{1 - p^2} \sigma_a^2, \quad E_f = T_f, \quad V_f = \frac{1 - (1 - p)^{2n}}{1 - (1 - p)^2} \sigma_f^2$$

with  $p = 1 - p_{seg;DF}$ . Then at the  $n$ th triplet during segregation they were  $E[x_I] = E_a$ ,

$Var[x_I] = V_a$ ,  $E[x_S] = E_f$ ,  $Var[x_S] = V_f$  with  $E_a$ ,  $V_a$ ,  $E_f$ ,  $V_f$  defined as above but



computed with  $p = p_{seg;DF}$ . Given that 3 times the standard deviation from the mean 976  
accounts for 99.73% of values in a normal distribution, if  $\sigma_a$  was too small the 977  
accumulators could cross the threshold 1 only with very small probability. From the 978  
calculation above, a lower bound for  $\sigma_a$  in the model was estimated at  $\sigma_a > \sigma_{a,min}$  with 979  
 $\sigma_{a,min} = (1 - T_a)\sqrt{1 - p_M^2}/3$ , where  $p_M$  was the maximum of  $p_{seg;DF}$  and  $1 - p_{seg;DF}$  980  
for all  $DF = 3, 5, 7$ . For example, if  $T_a = 0.9$  then a necessary condition for switching 981  
was  $\sigma_a > 0.022$ . 982

### Statistical properties of ACC-activation 983

As explained in the previous section, for small  $\sigma_a$  the accumulators in the EVA model 984  
could not cross threshold 1 (Fig 7; na, gray region). Numerical simulations showed that 985  
when  $\sigma_a$  increased to the right of curve  $\sigma_a = \sigma_{a,min}$  in the  $(\sigma_a, T_a)$ -plane, alternations 986  
between percepts occurred and the dominant durations were distributed according to: 987  
normal distributions at  $\sigma_a$  small (the parameter  $\alpha$  in Eq (3) was very large) or to 988  
exponential distributions at  $\sigma_a$  large ( $\alpha$  in (3) was near 1); see Fig 7, regions labeled “N” 989  
and “E”, respectively. At intermediate values  $\sigma_a$ , the distributions were gamma-like 990  
with shape close to that found experimentally (Fig 7, region labeled “G” between the 991  
two white curves). In the latter case, parameter  $\alpha$  in (3) was either near 2 (for first 992  
percept durations) or near 2.6 (for subsequent durations), and it differed from  $\alpha_{exp}$  by 993  
relative error up to 20%,  $|\alpha/\alpha_{exp} - 1| \leq 0.2$  (except for first and subsequent  $I$  at  $DF=7$  994  
at which the range for  $\alpha$  was extremely narrow and we allowed for a larger error, up to 995  
30% instead). The range for  $\sigma_a$  that led to gamma-like distributions varied slightly with 996  
 $N_{sl}$  with the biggest difference being identified at  $N_{sl} = 1$ ; see S3 Fig. 997

### Data-driven parameters for EVA model 998

Parameter mean values  $m_{t,DF}$  were used to generate Poisson spike counts of IL-units at 999  
each triplet  $t$  ( $t = 1, 2, \dots, 60$ ) in the  $ABA_-$  sequence and for each semitone difference 1000

$DF=3, 5, 7$ ; see section *Input Layer* and Eq (4). They were derived from multi-unit spiking neural data recorded from macaque monkey primary auditory cortex A1 by [1], using a procedure that combined exponential fitting with numerical interpolation. First, mean spike counts  $m_{t,DF}$  at A-tone selective neurons in A1 during presentation of tones  $A, B$  and  $A$  in  $ABA_-$  were extracted from [1] for each triplet  $t \leq 20$  in the sequence and for each  $DF=1, 3, 6, 9$ ; See scatter points in [1, Fig.3]; also S4 Fig. The mean spike counts at each tone decreased from value  $m_{1,DF}$  measured at the first triplet to some level  $m_{DF}^*$  at which they stabilized after a few seconds since stimulus onset. They were fitted by functions

$$m_{t,DF} \approx m_{DF}^* + (m_{1,DF} - m_{DF}^*)e^{-1.1(t-1)} \quad (8)$$

with parameters  $m_{DF}^*$  chosen to minimize the least-squares error between the extracted mean spike counts  $m_{t,DF}$  and the corresponding exponential curve ( S4 Fig, solid curves). In particular, significant differences in mean spike counts at different  $DF$  values were observed only during tone- $B$  presentation with fitting (8) achieved for parameter values  $m_{1,1} = 7.25, m_{1,3} = 6.25, m_{1,6} = 6, m_{1,9} = 5.25$  (according to data from [1]) and  $m_1^* = 6.09, m_3^* = 4.57, m_6^* = 3.95, m_9^* = 3.44$  respectively. Secondly, simulations of EVA model were performed for  $DF= 3, 5, 7$  instead of 1, 3, 6, 9, and for a total of 60 rather than 20 triplets. We implemented these constraints in two steps: for  $DF=3$  we chose the mean spike counts  $m_{t,DF}$  as in [1] for  $t \leq 20$  and as  $m_{DF}^*$  for  $t > 20$ . Then for  $DF=5$  and  $DF=7$  and each triplet  $t$  we defined the mean spike counts by interpolation using the power function  $m_{t,DF} = a_t DF^{b_t}$  whose coefficients  $a_t, b_t$  satisfied the least-squares fit between this curve and the points  $(DF, m_{t,DF})$  defined by (8) for all  $DF=1, 3, 6, 9$  at any fixed  $t$ .

The mean spike counts for  $B$ -tones of any pool of  $A$ -tone selective IL neuronal units, as well as the standard error to the mean, were computed from simulation of Poisson processes with parameter  $m_{t,DF}$  while varying  $N_{in}$  (Fig 8A). Then a threshold value

$C_{th}$  was chosen to minimize the squared differences error between the model-based 1026  
probabilities (4) of a sampler to support the segregation percept for all  $DF=3, 5, 7$  and 1027  
the behavioral buildup functions, applied to the last 30 triplets (15 seconds) of the 1028  
stimulus (Fig 8B). The pair of parameter values  $N_{in} = 5$ ,  $C_{th} = 4.21$  that generated the 1029  
minimum error was then used in numerical simulations of the EVA model. 1030

## EVA model versus classical drift-diffusion models 1031

To gain some intuition about the accumulation process in our EVA model and about 1032  
the timing of switch events, we considered an approximation of the stochastic Eqs (6) in 1033  
continuous time. For that, we assumed the drift in (6) to be constant and neglected its 1034  
dependence on activity  $x$ . Then percept durations corresponded to the first-passage 1035  
time of the ACC-unit that accumulated evidence against the current percept. Its 1036  
equation could be interpreted as the constant-drift continuous-time diffusion model 1037  
(DDM)  $dx = \gamma_a dt + \sigma_a dW_t$  with positive drift rate  $\gamma_a$ , noise amplitude  $\sigma_a$ , Gaussian 1038  
white noise  $dW_t$ , and decision threshold  $\theta = 1$ . In this DDM, the likelihood of 1039  
first-passage at time  $t$  follows an inverse Gaussian distribution [28] with density function 1040  
 $f(t) = \frac{1}{\sigma_a \sqrt{2\pi t^3}} \exp\left(-\frac{(t-1/\gamma_a)^2}{2t(\sigma_a^2/\gamma_a^2)}\right)$  and mean  $1/\gamma_a$ , variance  $\gamma_a + \sigma_a^2$ , and coefficient of 1041  
variation  $CV = \sqrt{1/\gamma_a + \sigma_a^2/\gamma_a^2}$ . Moreover, the inverse Gaussian resembles a gamma 1042  
distribution for large  $CV$  but converges to a normal distribution as  $\sigma_a$  decreased in 1043  
relation to drift rate  $\gamma_a$  [28]. To some extent, the dynamics of the discrete-time ACC (6) 1044  
share similarities with DDM above. Numerical simulations of our EVA model showed 1045  
that gamma-like distributions of percept durations were possible only for  $\sigma_a$  chosen in a 1046  
restricted parameter range, given fixed targets  $T_a$  and  $T_f$  (see section *Statistical* 1047  
*properties of ACC-activation*). Outside this range, percept durations followed either 1048  
normal distributions (for lower values of  $\sigma_a$ ) or exponential distributions (for larger 1049  
values of  $\sigma_a$ ). However, the accumulation process in the EVA model is different than in 1050

the DDM for several reasons: Eqs (6) are discrete-time drift diffusion models; they 1051  
include leakage; their deterministic version admits bistable non-oscillatory solutions (no 1052  
threshold crossing); and the input drive from SL is itself stochastic with fluctuations 1053  
described by (7). 1054

## Acknowledgments 1055

The authors thank Xiayi Wang, Haiming Chen and Kirill V. Nourski for help with data 1056  
acquisition, and Dan Tranchina for suggestions on data analysis. 1057

## References 1058

1. Micheyl C, Tian B, Carlyon R, Rauschecker J. Perceptual Organization of Tone 1059  
Sequences in the Auditory Cortex of Awake Macaques. *Neuron*. 2005;48:139–148. 1060
2. Pressnitzer D, Hupé JM. Temporal dynamics of auditory and visual bistability 1061  
reveal common principles of perceptual organization. *Current Biology*. 1062  
2006;16:1351–1357. 1063
3. Pressnitzer D, Sayles M, Micheyl C, Winter IM. Perceptual organization of sound 1064  
begins in the auditory periphery. *Current Biology*. 2008;18:1124–1128. 1065
4. Deike S, Heil P, Böckmann-Barthel M, Brechmann A. The build-up of auditory 1066  
stream segregation: a different perspective. *Frontiers in Psychology*. 1067  
2012;3:461:1–7. 1068
5. Barniv D, Nelken I. Auditory streaming as an online classification process with 1069  
evidence accumulation. *PLoS ONE*. 2015;10(12):e0144788:1–20. 1070
6. Rankin J, Sussman E, Rinzel J. Neuromechanistic model of auditory bistability. 1071  
*PLoS Computational Biology*. 2015;DOI:10.1371/journal.pcbi.1004555:1–34. 1072

7. Fishman YI, Reser DH, Arezzo JC, Steinschneider M. Neural correlates of auditory stream segregation in primary auditory cortex of the awake monkey. *Hearing Research*. 2001;151:167–187.
8. Fishman YI, Arezzo JC, Steinschneider M. Auditory stream segregation in monkey auditory cortex: effects of frequency separation, presentation rate, and tone duration. *J Acoust Soc Am*. 2004;116(3):1656–1669.
9. Curtu R, Wang X, Brunton BW, Nourski KV. Neural Signatures of Auditory Perceptual Bistability Revealed by Large-Scale Human Intracranial Recordings. *Journal of Neuroscience*. 2019;39(33):6482–6497.
10. van Noorden LPAS. Temporal coherence in the perception of tone sequences. Doctoral Dissertation, Eindhoven University of Technology; 1975.
11. Beauvois M, Meddis R. Computer simulation of auditory stream segregation in alternating-tone sequences. *J Acoust Soc Am*. 1996;99(4):2270–2280.
12. Micheyl C, Carlyon RP, Gutschalk A, Melcher JR, Oxenham AJ, Rauschecker JP, et al. The role of auditory cortex in the formation of auditory streams. *Hearing Research*. 2007;229:116–131.
13. Krishnan L, Elhilali M, Shamma S. Segregating Complex Sound Sources through Temporal Coherence. *PLoS Computational Biology*. 2014;10(12):e1003985:1–10.
14. Mill RW, Böhm TM, Bendixen A, Winkler I, Denham SL. Modelling the Emergence and Dynamics of Perceptual Organisation in Auditory Streaming. *PLoS Computational Biology*. 2013;9(3):e1002925.
15. Almonte F, Jirsa V, Large E, Tuller B. Integration and segregation in auditory streaming. *Physica D*. 2005;212:137–159.

16. Wang D, Chang P. An oscillatory correlation model of auditory streaming. *Cognitive Neurodynamics*. 2008;2(1):7–19. 1096  
1097
17. Steele S, Tranchina D, Rinzel J. An alternating renewal process describes the buildup of perceptual segregation. *Frontiers in Computational Neuroscience*. 2015;8:166:1–13. 1098  
1100
18. Szabó BT, Denham SL, Winkler I. Computational Models of Auditory Scene Analysis: A Review. *Frontiers in Neuroscience*. 2016;10:524: 1–16. 1101  
1102
19. Rankin J, Rinzel J. Computational models of auditory perception from feature extraction to stream segregation and behavior. *Current Opinion in Neurobiology*. 2019;58:46–53. 1103  
1105
20. Hill KT, Bishop CW, Miller LM. Auditory grouping mechanisms reflect a sound’s relative position in a sequence. *Frontiers in Human Neuroscience*. 2012;6(158):1–7. 1106  
1107
21. Scholes C, Palmer A, Sumner CJ. Stream segregation in the anesthetized auditory cortex. *Hearing Research*. 2015;328:48–58. 1108  
1109
22. Shpiro A, Moreno-Bote R, Rubin N, Rinzel J. Balance between noise and adaptation in competition models of perceptual bistability. *Journal of Computational Neuroscience*. 2009;27(1):37–54. 1110  
1112
23. Moreno-Bote R, Rinzel J, Rubin N. Noise-induced alternations in an attractor network model of perceptual bistability. *Journal of Neurophysiology*. 2007;98:1125–1139. 1113  
1115
24. Cao R, Pastukhov A, Mattia M, Braun J. Collective activity of many bistable assemblies reproduces characteristic dynamics of multistable perception. *Journal of Neuroscience*. 2016;36 (26):6957–6972. 1116  
1118

25. Ermentrout GB, Terman DH. *Mathematical Foundations of Neuroscience*. 1119  
Springer. 2010;35. 1120
26. Green DM, Swets JA. *Signal Detection Theory and Psychophysics*. New York: 1121  
Wiley; 1966. 1122
27. Parker AJ, Newsome WT. Sense and the single neuron: probing the physiology of 1123  
perception. *Annual Review of Neuroscience*. 1998;21:227–277. 1124
28. Simen P, Rivest F, Ludvig EA, Balci F, Killeen P. Timescale Invariance in the 1125  
Pacemaker-Accumulator Family of Timing Models. *Timing & Time Perception*. 1126  
2013;1:159–188. 1127
29. Cao R, Braun J, Mattia M. Stochastic accumulation by cortical columns may 1128  
explain the scalar property of multi-stable perception. *Physical Reviews Letters*. 1129  
2014;113 (9):098103: 1–5. 1130
30. Latimer K, Yates J, Meister M, Huk A, Pillow J. Single-trial spike trains in 1131  
parietal cortex reveal discrete steps during decision-making. *Science*. 2015;349 1132  
(6244):184–187. 1133
31. Shadlen MN, Kiani R, Newsome WT, Gold JI, Wolpert DM, Zylberberg A, et al. 1134  
Comment on "Single-trial spike trains in parietal cortex reveal discrete steps 1135  
during decision-making". *Science*. 2016;351 (6280):1406. 1136
32. Zoltowski DM, Latimer KW, Yates JL, Huk AC, Pillow JW. Discrete Stepping 1137  
and Nonlinear Ramping Dynamics Underlie Spiking Responses of LIP Neurons 1138  
during Decision-Making. *Neuron*. 2019;102:1249–1258. 1139
33. Shpiro A, Curtu R, Rinzel J, Rubin N. Dynamical characteristics common to 1140  
neuronal competition models. *Journal of Neurophysiology*. 2007;97:462–473. 1141

34. Wang XJ, Rinzel J. Alternating and synchronous rhythms in reciprocally inhibitory model neurons. *Neural Computation*. 1992;4:84–97. 1142  
1143
35. Skinner F, Kopell N, Marder E. Mechanisms for oscillation and frequency control in reciprocally inhibitory model neural networks. *Journal of Computational Neuroscience*. 1994;1:69–87. 1144  
1145  
1146
36. Curtu R, Shpiro A, Rubin N, Rinzel J. Mechanisms for frequency control in neuronal competition models. *SIAM Journal on Applied Dynamical Systems*. 2008;7(2):609–649. 1147  
1148  
1149
37. Curtu R, Rubin J. Interaction of canard and singular Hopf mechanisms in a neural model. *SIAM Journal on Applied Dynamical Systems*. 2011;10(4):1443–1479. 1150  
1151  
1152
38. Gigante G, Mattia M, Braun J, Giudice PD. A Bistable Perception Modeled as Competing Stochastic Integrations at Two Levels. *PLoS Computational Biology*. 2009;5 (7):e1000430: 1–9. 1153  
1154  
1155
39. Rankin J, Osborn Popp PJ, Rinzel J. Stimulus pauses and perturbations differentially delay or promote the segregation of auditory objects: psychoacoustics and modeling. *Frontiers in Neuroscience*. 2017;11 (198):1–12. 1156  
1157  
1158
40. Bregman AS. Auditory scene analysis: the perceptual organization of sound. The MIT Press; 1990. 1159  
1160
41. Novikov A, Kordzakhia N. Martingales and first passage times of AR(1) sequences. *Stochastics: An International Journal of Probability and Stochastic Processes*. 2008;80 (2-3):197–210. 1161  
1162  
1163



## Supporting information

1164

**S1 Fig. The evidence accumulation (EVA) model captures experimental mean duration ( $\mu$ ) and shape of gamma-like distributions ( $\alpha$ ) for first and subsequent percept durations at other  $DF$  values.** Distributions of normalized phase durations are shown for A:  $DF=3$  and B:  $DF=7$ . They are obtained from numerical simulations of the EVA model (columns 2,4) and compared to those derived from behavioral data (columns 1,3).

1165

1166

1167

1168

1169

1170

**S2 Fig. Exemplar time courses of accumulators in the EVA model, shown for  $DF=3$  (top) and  $DF=7$  (bottom).** In only a few trials, 103 out of 675 for  $DF=3$  and 220 out of 675 for  $DF=7$ , the first percept is segregation (see panels 2,4). During a cycle, the suppressed unit accumulates evidence against the current percept until it reaches the switching threshold. Then, a perceptual switch occurs and accumulators are reset to the same value. In the noise free case, the accumulators stabilize to their corresponding target values and there are no alternations. Such trajectories are depicted by dashed lines.

1171

1172

1173

1174

1175

1176

1177

1178

**S3 Fig. Mean percept durations ( $\mu$ ) and shape parameter values ( $\alpha$ ) in the EVA model are largely unaffected by changes in  $N_{sl}$ , the number of units in the sampler layer.** Some important differences occur, however, at  $N_{sl} = 1$  (e.g. for subsequent durations). A two-parameter response diagram of the dependence of  $\mu$  and  $\alpha$  on target-against  $T_a$  and noise strength  $\sigma_a$  is shown for  $DF=5$  and varying  $N_{sl}$  for A: first percepts and B: subsequent percepts. All parameters are chosen as described in Methods, except for  $N_{sl}$  (here  $N_{sl} = 1, 5$  or  $10$ ). For comparison, see Fig 7, middle column;  $N_{sl} = 20$  at  $DF=5$ . Red diamonds correspond to same parameter choices as in Fig 7 for  $N_{sl} = 20$ , as well. The heat map represents the ratio  $\mu/\mu_{exp}$  between model-generated  $\mu$  and mean duration  $\mu_{exp}$  from the behavioral data. Regions of no

1179

1180

1181

1182

1183

1184

1185

1186

1187

1188

alternations (na) are colored in gray. Mean durations are much longer than their 1189  
experimental counterparts  $\mu_{exp}$  (region in warm colors), much shorter than  $\mu_{exp}$  (region 1190  
in cool colors), or close to  $\mu_{exp}$  (within one standard error to  $\mu_{exp}$ ; in green; black dots 1191  
depict a discrete selection of values in the green region). The distributions of normalized 1192  
percept durations are characterized by three distinct regions: for small  $\sigma_a$  the 1193  
distributions are normal (region N, to the left of dashed-white line;  $\alpha \gg 3$ ); for large  $\sigma_a$  1194  
the distributions are exponential (region E, to the right of solid-white line;  $\alpha$  near 1); 1195  
for intermediate values  $\sigma_a$  the distributions are gamma-like with shape close to that 1196  
found experimentally (region G, between white contours;  $\alpha \approx 2$  for first percepts and 1197  
 $\alpha \approx 2.6$  for subsequent percepts;  $\alpha$  differs from  $\alpha_{exp}$  by relative error up to 20% except 1198  
for integration at  $DF=7$  where it is up to 30%). As in Fig 7, middle column, the 1199  
intersection of white contours with the sheet of black dots identifies parameter values 1200  
that yield well-fit data. Note that at  $N_{sl} = 1$  this intersection is empty for both 1201  
subsequent percepts  $I$  and  $S$  (panel B, first column). 1202

**S4 Fig. The signal detection algorithm for constructing a neurometric 1203  
function (the probability of segregation as a function of time) generates 1204  
acceptable buildup fits at  $DF= 1, 3, 6, 9$ .** For comparison, see Micheyl et al 1205  
(2005) [1]. Upper panel: mean spike counts  $m_{t,DF}$  (scatter points) at  $A$ -tone selective 1206  
neurons in A1 during tone  $B$  were extracted from [1, (Fig.3A)]. They correspond to 1207  
conditions  $DF=1$  (blue), 3 (green), 6 (red), 9 (cyan), based on 10 s (20 triplets) long 1208  
trials. The mean spike counts decrease exponentially and stabilize within a few seconds 1209  
(solid curves for the exponential fits). The algorithm generates spike counts during 1210  
 $B$ -tone by using Poisson processes of means  $m_{t,DF}$ , and then average them over  $N_{in}$  1211  
neuronal units. The average values of the mean spike counts, including asymptotic 1212  
values (written in parenthesis) at each  $DF$ , and the standard error to the mean (SEM) 1213  
are computed over 675 trials. Lower panel: The signal detection algorithm constructs 1214

neurometric functions using numerical data from all  $N_{in}$  neuronal units. Parameters 1215  
 $N_{in}$  and  $C_{th}$  are chosen to yield SEM similar to those observed in the spike count 1216  
data [1, (Fig.3A)] and to yield the least-squares error of the experimental buildups 1217  
(dashed, extracted from [1, (Fig.4)] and the computer-simulated neurometric functions 1218  
(solid) for  $DF= 1, 3, 6, 9$ . The best approximation is obtained for  $N_{in} = 30, C_{th} = 4.64$ . 1219  
Note: Statistics of percept durations were not reported in [1]; this prevented us from 1220  
comparing these aspects of behavioral data from [1] to our numerically-generated 1221  
duration distributions at  $DF=1, 3, 6, 9$ . 1222

**S5 Fig. EVA model with fixed target-against value  $T_a$  across all 1223**  
**conditions and percept types captures some, but not all, characteristics of 1224**  
**perceptual alternations.** For comparison, mean durations and shape parameter  $\alpha$  of 1225  
gamma distributions are shown for A: Experimental data; B: EVA model with 1226  
optimized values for target-against (see Methods, Parameter values used in model 1227  
simulations). EVA-generated results are identical to those in Figs 5 and 6; and 1228  
C: Non-optimized EVA simulated with  $T_a = 0.9$  across all  $DF= 3, 5, 7$  and first and 1229  
subsequent  $I, S$ . All other parameters are as in panel B. The mean durations from 1230  
simulations follow the trend of experimental data which is decreasing/increasing with 1231  
 $DF$  for  $I/S$  respectively. However, they fail to approximate well the entire set of 1232  
behavioral data (e.g. approximations of mean first durations at  $DF=3$  and  $DF=7$  are 1233  
inaccurate). On the other hand, gamma-fit shape values  $\alpha$  are comparable to those from 1234  
panels A and B. This is not surprising given that  $\alpha$  depends mostly on the noise-level 1235  
 $\sigma_a$ , as shown in Fig 7. 1236

**Fig 1. Stimulus, buildup, and distribution of first percept durations in auditory streaming of triplets.** A: Stimulus paradigm (left) used for behavioral experiments and corresponding percept types (right). Stimulus consists of sequences of high ( $A$ ) and low ( $B$ ) pure tones presented as repeated triplets  $ABA\_$  where ‘\_’ denotes silent gap. Depending on  $DF$  between tones  $A$  and  $B$ , there are two fundamental percepts: integration ( $I$ ; blue), one connected stream with galloping rhythm, and segregation ( $S$ ; red), two parallel streams of high tone  $A\_A\_A\_A\_$  and low tone  $\_B\_\_\_B\_\_\_$  occurring simultaneously. B: Computation of the buildup function (time course of probability of  $S$ ) obtained by determining the frequency of occurrence of  $S$  over all trials at each time point  $\tau$  up to 30 s (45 trials for each  $DF$  and subject; 15 subjects). Non- $S$  includes both latency (gray) and  $I$  (blue) states. Due to latency, the buildup function always starts at 0 even though the first percept is not necessarily  $I$ . For example, in Trial 2, the first percept is  $S$ . C: Experimental-based psychometric buildup function (upper panel) and distribution of first percept durations (middle and lower panels). Buildup functions are computed for  $DF=3$  (green), 5 (red), and 7 (cyan). The error bars indicate 95% CI around the mean using statistical bootstrapping. Durations are normalized by dividing by mean duration. Likelihood ratio test confirms that normalized first percept durations are gamma distributed – shown here at  $DF=5$  for  $I$  ( $N=533$ ,  $p=0.49$ ) and  $S$  ( $N=114$ ,  $p=0.47$ ). The shape parameters  $\alpha$ , obtained by Maximum Likelihood Estimation (MLE), and the mean durations  $\mu$  are indicated in the graphic. D: Model-based simulated buildup function (upper panel) and distribution of normalized first percept durations (middle and lower panels). Buildup functions from the evidence accumulation model (EVA; solid) closely resemble those from the behavioral experiment (dashed, also in C). Normalized first percept durations are gamma distributed (shown at  $DF=5$ ). Similar results are obtained for other  $DF$  values; see S1 Fig.

**Fig 2. A basic state-dependent model for evidence accumulation yields percept durations that are gamma-like distributed and with mean values similar to those observed in behavioral data.** To demonstrate the robustness of the model results and dependence on parameter values we simulated Eq (1) with various values for target  $T$  and noise level  $\sigma$ . Shown for  $DF=5$  with  $r = 0.6$ : (Left) Two-parameter response diagram of the first  $I$ -percept with respect to  $T$  and  $\sigma$ . There is no switch for very small noise levels (na; gray area). Threshold-crossing activity appears with increased noise and leads to percept durations that are distributed according to normal distributions (region N), gamma-like distributions (region G between the black dashed and black solid curves), or exponential distributions (region E). Parameter values that lie on the sheets of black and gray dots yield numerically generated first integration mean durations within one and two standard deviation(s) of the experimental mean. (Right) Insets are shown for  $T = 0.9$ ,  $\sigma = 0.085$  (black diamond in the diagram): computed distribution of first integration normalized durations and the early phase of numerical buildup obtained during one simulation run of Eq (1) are in agreement with behavioral data. For simplicity, the drift rate  $r$  was kept constant to 0.6 between all threshold crossings.

**Fig 3. Linking neural data with behavioral data in the EVA framework.**

Individual spike counts of A1 neurons are assumed to be Poisson with means  $m_{DF}$  such that  $m_3 > m_5 > m_7$  for  $DF=3, 5, 7$ . Averaged spike counts over  $N_{in}$  A1-neurons,  $\langle Spk \rangle = \frac{1}{N_{in}} \sum_{j=1}^{N_{in}} Spk_j$ , are normal-like distributed with means  $m_{DF}$  and standard deviation decreasing inversely with  $\sqrt{N_{in}}$ ; shown in gray ( $DF=3$ ), black ( $DF=5$ ) and light-gray ( $DF=7$ ) for  $N_{in}=10$  (upper panel) and  $N_{in}=100$  (lower panel). At each triplet,  $\langle Spk \rangle$  activates a sampler unit downstream if it exceeds a threshold  $C_{th}$  (solid black, vertical line). The area under the probability distribution to the left of  $C_{th}$  (white-dots pattern;  $DF=5$ ) determines the probability  $p$  of the sampler neuron to be inactive (0); the complementary probability  $1 - p$  is for the sampler to be active (1). For each  $N_{in}$ , the threshold  $C_{th}$  was chosen such that  $p = 0.6$  at  $DF=5$ , which is the asymptotic, approximate value of the corresponding behavioral buildup near equidominance (see Fig 1C; red curve). Probabilities  $p$  obtained at different  $DF$  vary from values being graded when  $N_{in}$  is small ( $N_{in}=10$ ), to values spread apart approaching zero or one when  $N_{in}$  is large ( $N_{in}=100$ ). A suitable variability in the A1-neuronal population is key if aiming to account for graded BUF levels observed in behavioral data (Fig 1C).

**Fig 4. Accumulation model as feed-forward auditory network of 3 layers.**

A: State of neurons at triplet  $t$  in the input layer and sampler layer of the evidence accumulation model. Input layer comprises A1 units with (triplet- and  $DF$ -dependent) mean spike counts presented in panel B. Sampler layer has  $N_{sl}=20$  binary neuronal units, either in state 1 (blue; favoring  $I$  percept) or state 0 (red; favoring  $S$  percept). Each unit samples a small number of input units ( $N_{in}=5$ ) and the averaged spike count across the units is compared to  $C_{th}$  (see panel B) to determine the unit's appropriate perceptual state. B: Mean spike counts (scatter plot) for tone  $B$  of tone- $A$ -selective neurons, and exponential fit (solid) of mean spike counts. These values are interpolated for our specific  $DF=3,5,7$  using data from cortical area A1 of awake macaque extracted from [1]. A Poisson spike count is generated using the mean value at each triplet. Asymptotic values of mean spike count (printed in parenthesis next to corresponding  $DF$  values) are used to generate spike counts after the 20-th triplet. Poisson spike counts are averaged across sets of  $N_{in}=5$  neuronal units, and the resulting values are subject to a binary neural threshold  $C_{th}$  (black horizontal line). The error bars indicate the standard errors of the mean spike counts. C: Accumulation layer has 2 accumulators drifting over successive triplets towards their own target values  $T_a$  and  $T_f$  where  $T_a > T_f$ . Their activities are governed by input factors from the sampler layer and stochastic factors. The noise level depends on the target ( $\sigma_a > \sigma_f$ ). During a cycle, the suppressed unit accumulates evidence against the current percept. A switch to the other percept occurs when the accumulator of the suppressed unit reaches the switching threshold of 1. A new cycle starts, with accumulators reset to appropriate values, and targets values switched to corresponding perceptual states. Shown for  $DF=5$ . For other  $DF$  values, see S2 Fig. For the complete list of parameter values, see Methods – section *Parameter values used in model simulations*.

**Fig 5. EVA model yields realistic first percept durations.** A: Mean percept durations (top) and fitted  $\alpha$  value (bottom) from gamma distribution of first  $I$  (blue) and first  $S$  (red) percepts from behavioral experiment for  $DF=3,5,7$ . The error bars indicate 95% CI around the mean and are obtained from statistical bootstrapping (see *Methods*). The mean durations of  $I$  decrease with  $DF$  while those of  $S$  increase with  $DF$ . The shape parameters  $\alpha$  from gamma-fit using MLE for  $DF=3,5,7$  are also presented here. There is no observed trend for  $\alpha$  values. B: Mean percept durations (top) and fitted shape parameter  $\alpha$  (bottom) from gamma distribution of first  $I$  (blue) and first  $S$  (red) states from EVA model. The error bars are 95% CI obtained from 100 Monte Carlo runs to show the robustness of the model. The mean values of duration follow the similar trend as those from experiment. Also, the shape parameters show a close resemblance to those from the experiment. Related results are included in S5 Fig.



**Fig 6. EVA model yields realistic subsequent percept durations and distributions.** A: Distribution of normalized subsequent percept durations (top) and other properties (bottom) from behavioral experiment. (Top) Likelihood ratio test confirms that both subsequent  $I$  (blue;  $N=1642$ ,  $p=0.49$ ) and  $S$  (red;  $N=1785$ ,  $p=0.49$ ) percepts follow a gamma distribution, shown here for  $DF=5$ . The shape parameters  $\alpha$  computed using MLE, and the mean durations  $\mu$  are shown in the graphic. (Bottom) Mean subsequent durations for  $I$  (blue) and  $S$  (red) for  $DF=3,5,7$ . The error bars indicate 95% CI around the mean, computed using statistical bootstrapping (see *Methods*). Similar to the first percept, mean durations of subsequent  $I$  and  $S$  show a “cross-diagram” like behavior [6, Fig.9B] with equidominance near  $DF=5$ ; the ratio between mean durations for  $I$  and  $S$  percepts changes from larger than 1 to smaller than 1 when crossing  $DF=5$ , near equidominance. The shape parameters  $\alpha$  from MLE for  $DF=3,5,7$  are also presented, and no trend for  $\alpha$  values is found. B: Distribution of normalized subsequent percept durations (top) and properties (bottom) from EVA model. (Top) Normalized subsequent percepts are gamma distributed for  $DF=5$  with mean durations  $\mu$  and shape parameters  $\alpha$  shown in the figure; similar results are obtained for other  $DF$  values, see S1 Fig. (Bottom) Mean percept durations and fitted shape parameters  $\alpha$  for  $DF=3,5,7$  from EVA model. Mean subsequent durations follow the same trend and the shape parameters have similar values as compared to those from the experiment. The error bars are 95% CI obtained from 100 Monte Carlo runs of the model. The result shows the robustness and consistency of the model. Related results are shown in S5 Fig.

**Fig 7. Dependence of mean percept durations and shape of distributions on target  $T_a$  and stochastic term  $\sigma_a$ , in the EVA model.** Diagrams show the difference between the mean duration  $\mu$  derived from numerical simulations of the model and mean  $\mu_{exp}$  from the behavioral data, represented as ratio  $\mu/\mu_{exp}$ ; see the color scheme. Results are shown for A: first and B: subsequent integration and segregation percepts at conditions  $DF=3,5,7$ . Given a fixed value for  $T_a$ , the dynamics changes from no alternations between percepts at small  $\sigma_a$  (na; in gray); to alternations of mean durations much longer than the experimental mean (region in warm colors); to mean durations that approximate well the corresponding experimental values (within one standard error to  $\mu_{exp}$ ; in green; black dots depict a discrete selection of values in the green region); then, to mean durations much shorter than  $\mu_{exp}$  (region in cool colors). In each diagram,  $\sigma_a$ ,  $T_a$  that were used to generate model-based results are identified by a red diamond (see Methods,  $\sigma_a = 0.085$ ,  $T_a$  varies). Besides mean durations, the shapes of the gamma-like distributions that fit normalized percept durations depend on  $T_a$  and  $\sigma_a$  as well ( $\alpha$  is the shape-parameter in the gamma-fit; see Eq (3) in Methods). There are three main regions that characterize  $\alpha$  and they are delineated by the dashed-white and solid-white curves. Low-level of noise  $\sigma_a$  yields normal distributions (region N, to the left of dashed-white line;  $\alpha \gg 3$ ) while high-level of noise yields exponential distributions (region E, to the right of solid-white line;  $\alpha$  near 1). For intermediate level of noise, the distributions are gamma-like with shape close to that found experimentally (region G, between white contours;  $\alpha \approx 2$  for first percepts and  $\alpha \approx 2.6$  for subsequent percepts;  $\alpha$  differs from  $\alpha_{exp}$  by relative error up to 20% except for integration at  $DF=7$  where it is up to 30%). The parameter range where both model-generated mean duration and shape of distribution are good approximations of their corresponding experimental observations is found at the intersection of region G with the sheet of black dots. Related results are shown in S3 Fig.

### Fig 8. Parameter fitting for input and sampler layers in the EVA model.

The signal detection algorithm for constructing a neurometric function (the probability of a sampler to support the segregation percept) utilizes spike count time courses as shown in panel A (data extracted from [1] and interpolated for the cases  $DF=3, 5, 7$ ); see below for more detail. The behavioral buildup functions (dashed, in panel B) occupy intermediate ranges of probability of  $S$ , and show slow initial rise for  $DF=3, 5$ . The simulated functions (solid, in panel B) do not capture the slow-rising phase of behavior buildup, and the spread between the neurometric curves increases unacceptably at larger  $N_{in}$ . For an optimal choice of parameters  $N_{in}, C_{th}$ , the algorithm yields well-fit asymptotic values of behavioral data. A: Mean spike counts  $m_{t,DF}$  are interpolated at  $DF=3, 5, 7$  st from data in [1], and then extended for triplets  $t \leq 60$ ; see Methods. (Note: In [1, Fig.3] mean spike count data were shown for  $A$ -tone selective neurons in A1 during triplet tones at  $DF=1, 3, 6, 9$ . They decreased exponentially and stabilized within a few seconds. Mean spike counts changed with  $DF$  only during  $B$ -tone.) Herein, spike counts during  $B$ -tone are generated using Poisson processes of means  $m_{t,DF}$  ( $DF=3, 5, 7$ ) and then averaged over  $N_{in}$  neuronal units of the input layer IL (e.g.  $N_{in}=1, 5, 30, 100$ ). The average values of the mean spike counts and the standard error to the mean (SEM) are computed over 675 trials. Averages, including asymptotic values (written in parenthesis, at each  $DF$ ), do not change with  $N_{in}$  but SEM decreases with a factor of  $1/\sqrt{N_{in}}$ . B: The signal detection algorithm [1] generates neurometric functions using numerical data from IL-pools of  $N_{in}$  neuronal units; parameter  $C_{th}$  is chosen to yield the least-squares error of the experimental buildups and the computer-simulated neurometric functions for  $DF=3,5,7$ . If  $N_{in}$  is small the neurometric curves tend to bunch together due to overlapping and large SEM regions across conditions. As  $N_{in}$  gets bigger, the neurometric curves are pushed apart. The best approximation to the set of psychophysical buildups is obtained for  $N_{in} = 5, C_{th} = 4.21$ .

**Fig 9. Signal detection algorithm adapted from [1] yields exponential distributions and unrealistic mean durations of percepts.** (Top) Binary threshold  $C_{th}$  is chosen to yield the least-squares error between neurometric buildups (solid) and behavioral buildups (dashed) at  $DF=3,5,7$ . Poisson spike counts are averaged across a sample of  $N_{in}=5$  neuronal units and compared to  $C_{th}$  to classify a triplet either as  $I$  or  $S$ . Trial-averaging the  $S$ -tagged responses produces the neurometric functions. The threshold value is determined by least-squares fit for A: the first 15 seconds of the stimulus to match the transients, or for B: the last 15 seconds of the stimulus to match the asymptotic level of the behavioral buildup; See also Fig 8. (Bottom) Trial-by-trial applications of the signal detection algorithm from [1] with A:  $C_{th}=4.01$  and B:  $C_{th}=4.21$  yield exponentially distributed subsequent percept durations for  $I$  (blue) and  $S$  (red). Their mean values  $\mu$  are significantly smaller than those reported in the experiment. Note: Same parameter values  $N_{in}=5$ ,  $C_{th}=4.21$  were used in the EVA model for activation of the sampler layer SL (Fig 4A-B) and obtain gamma-like distributions of percepts (Figs 1D and 6B).

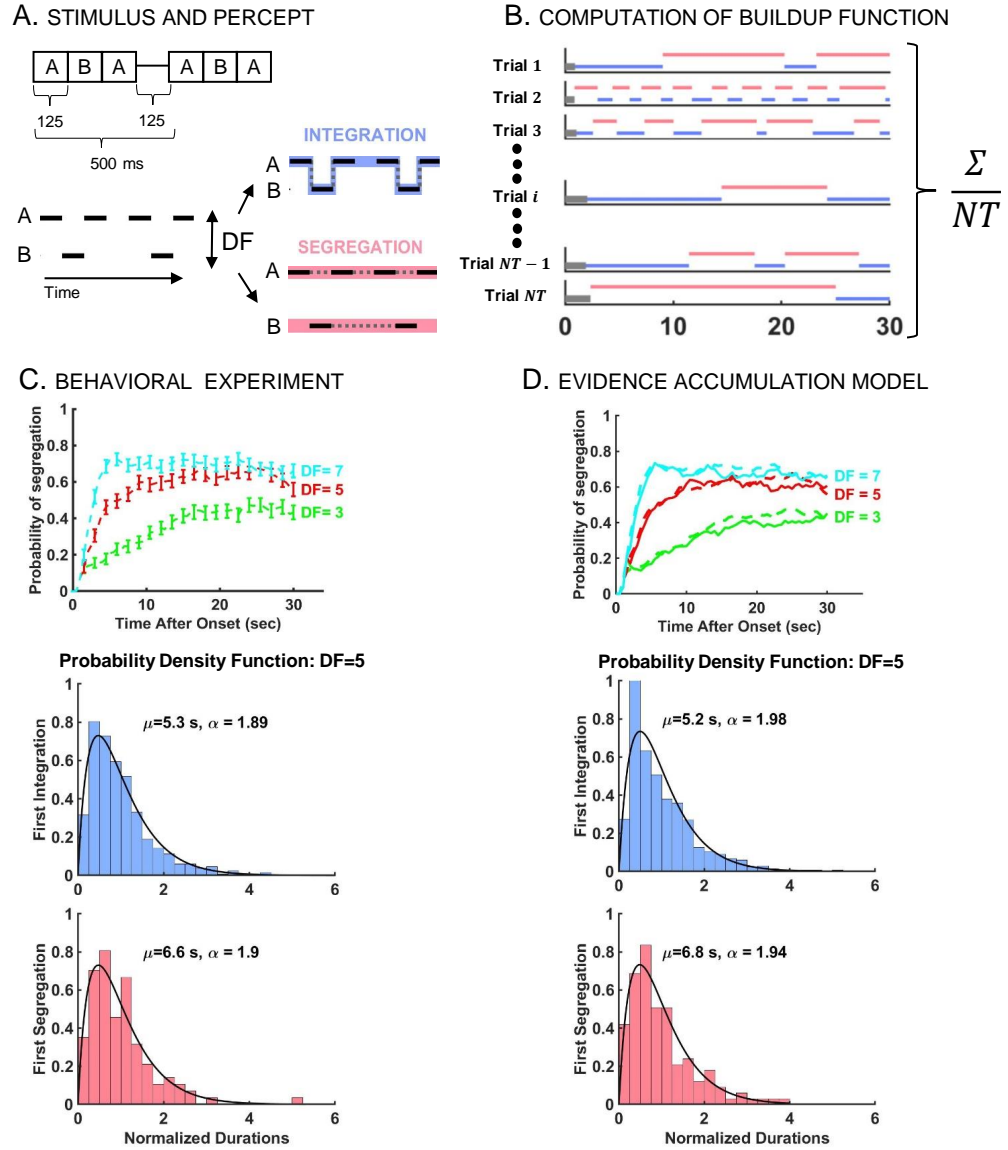

Fig 1

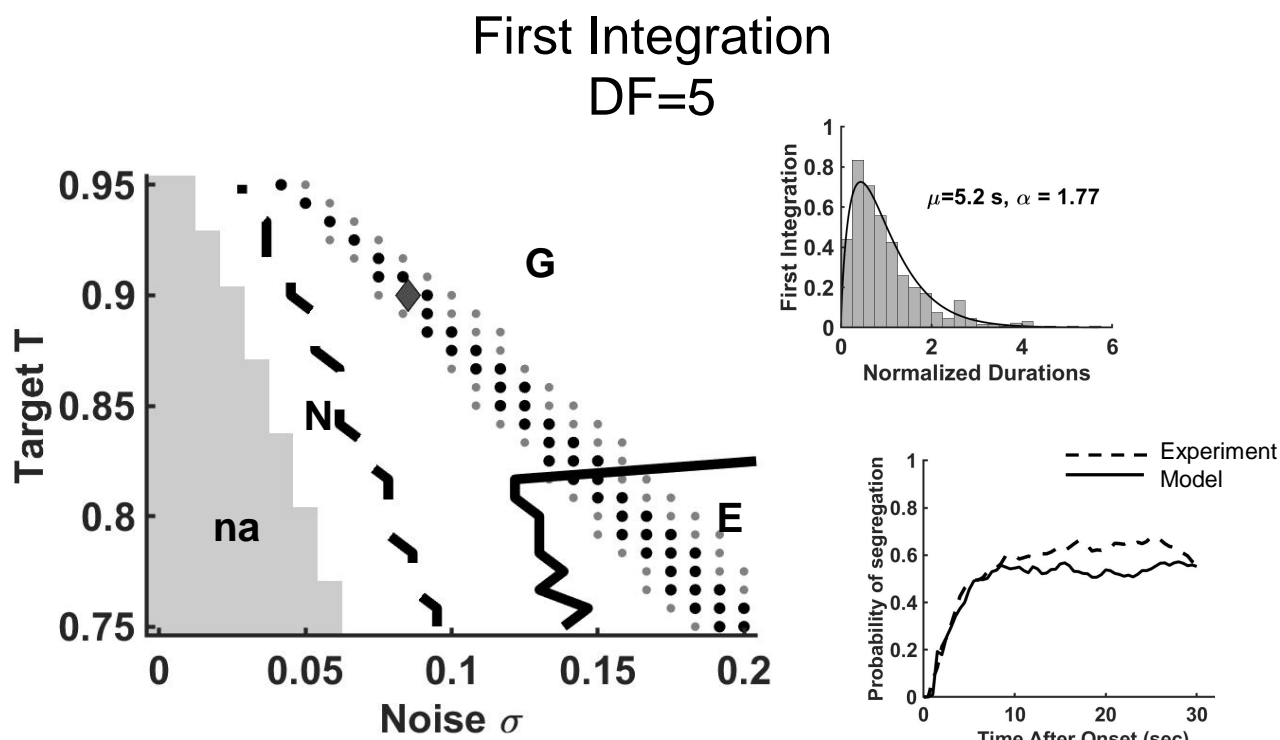

Fig 2

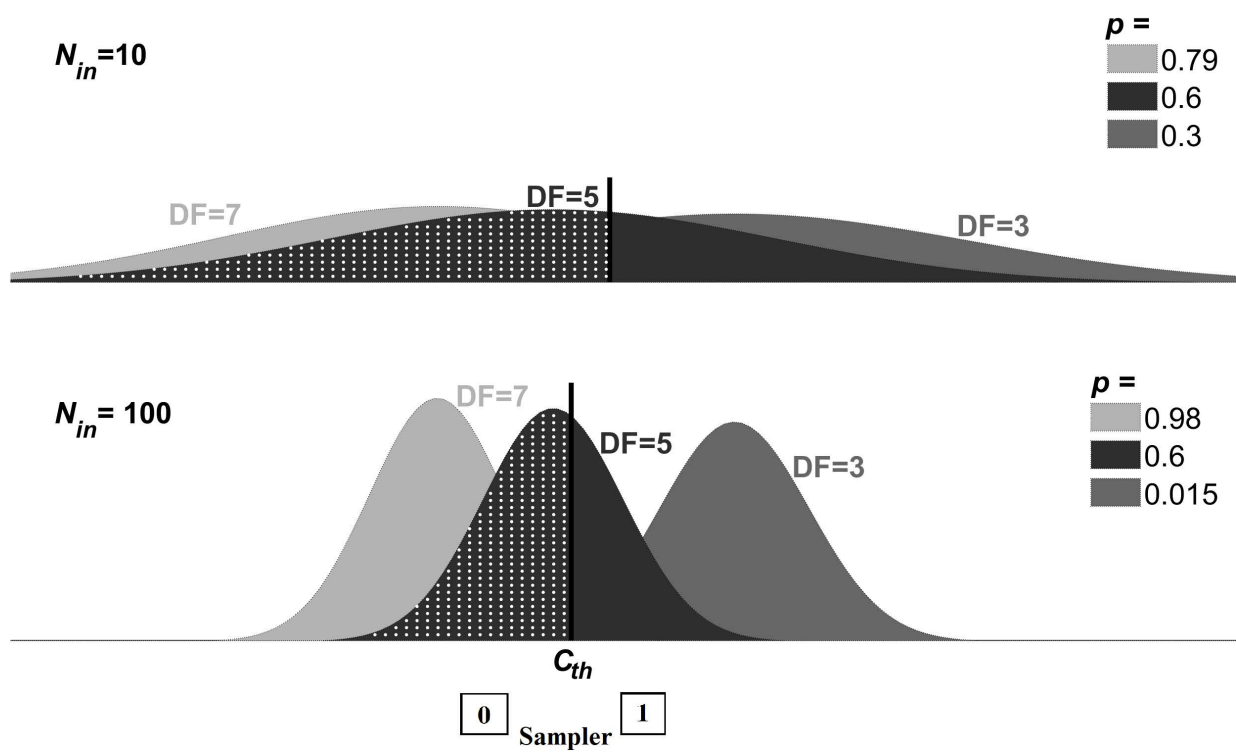

Fig 3

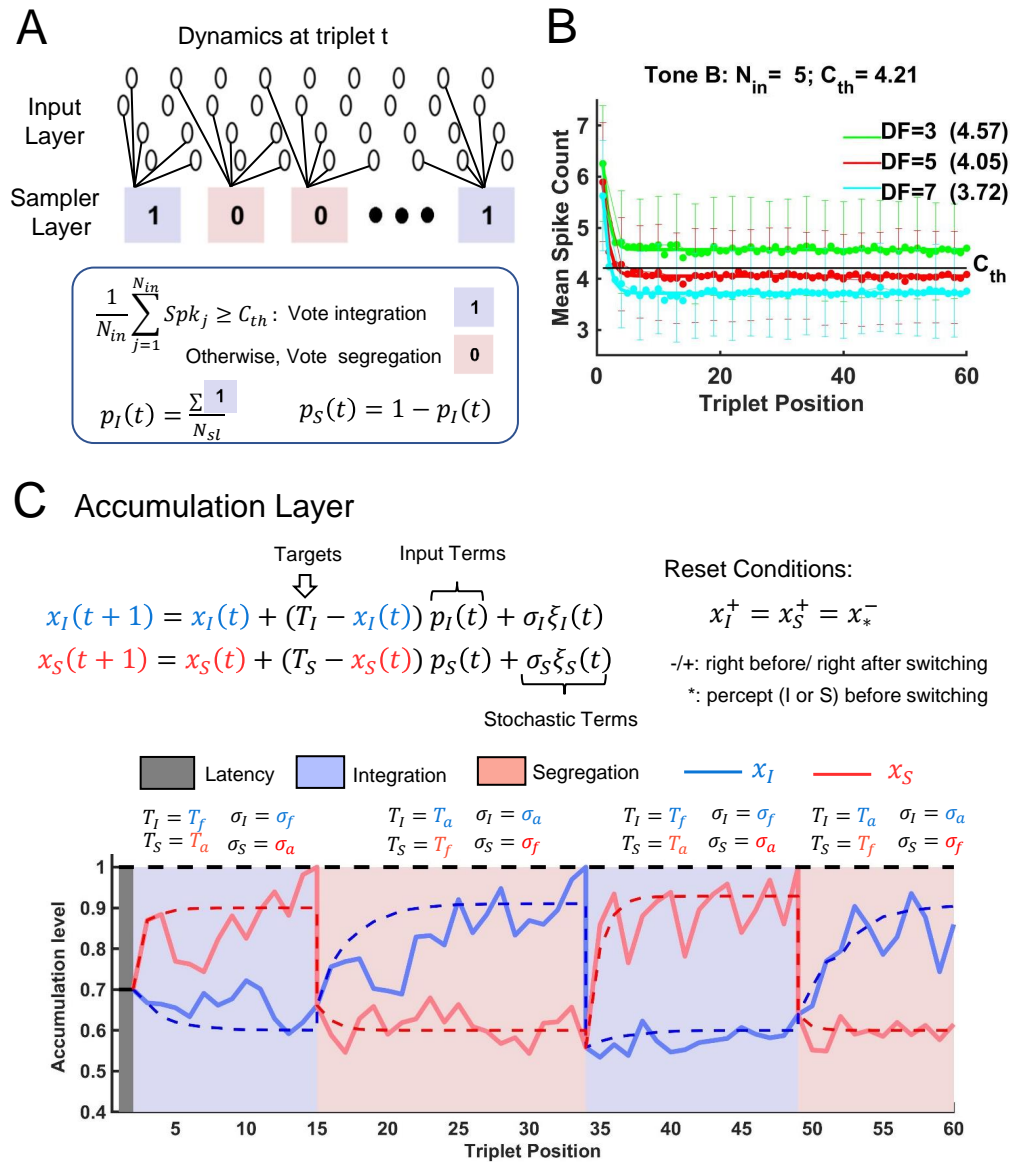

Fig 4



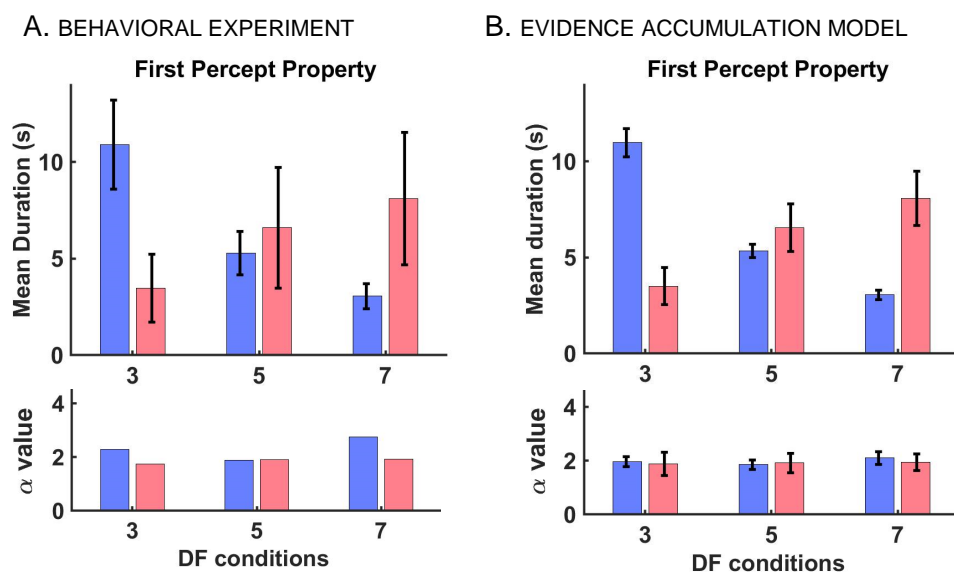

Fig 5

A. BEHAVIORAL EXPERIMENT

B. EVIDENCE ACCUMULATION MODEL

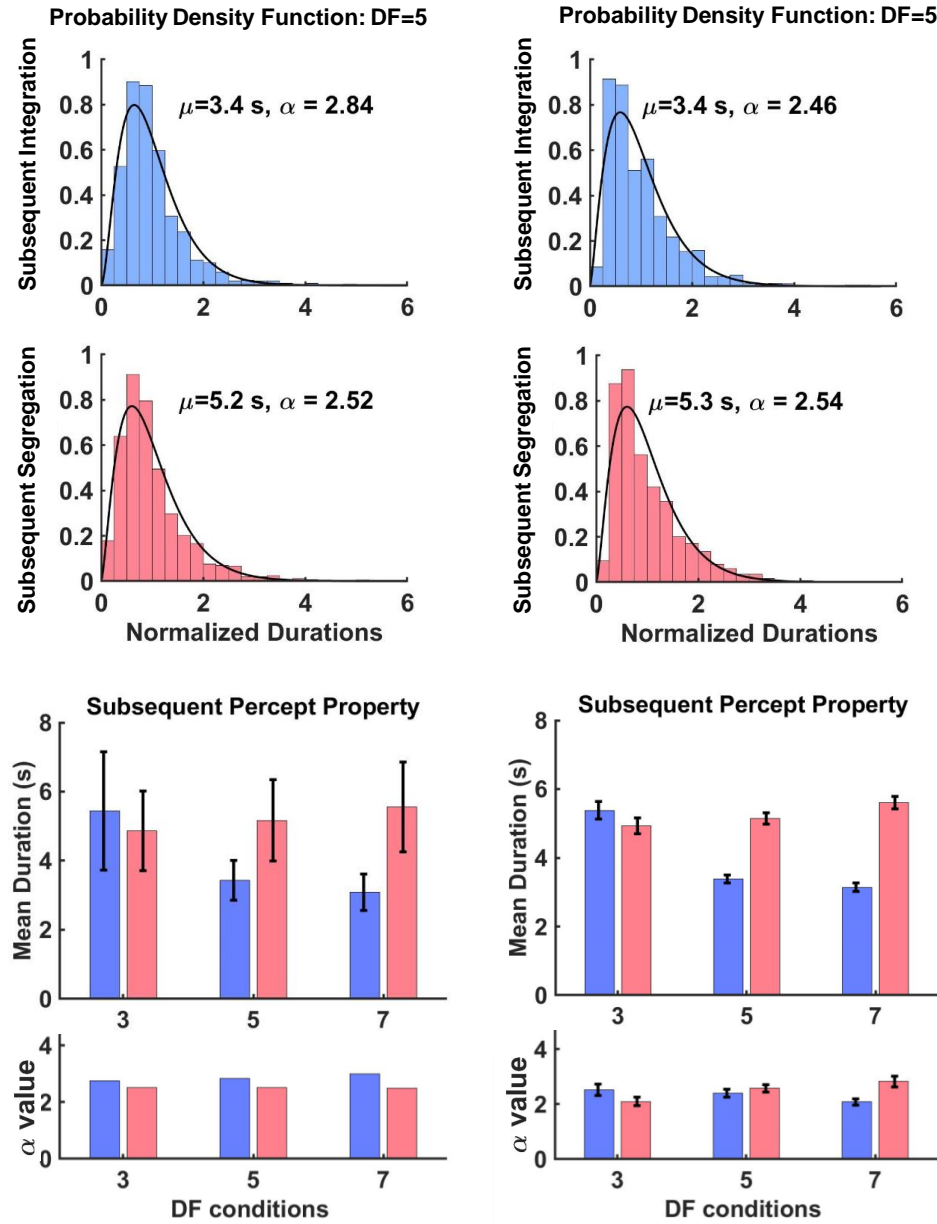

Fig 6

### A. First Percept

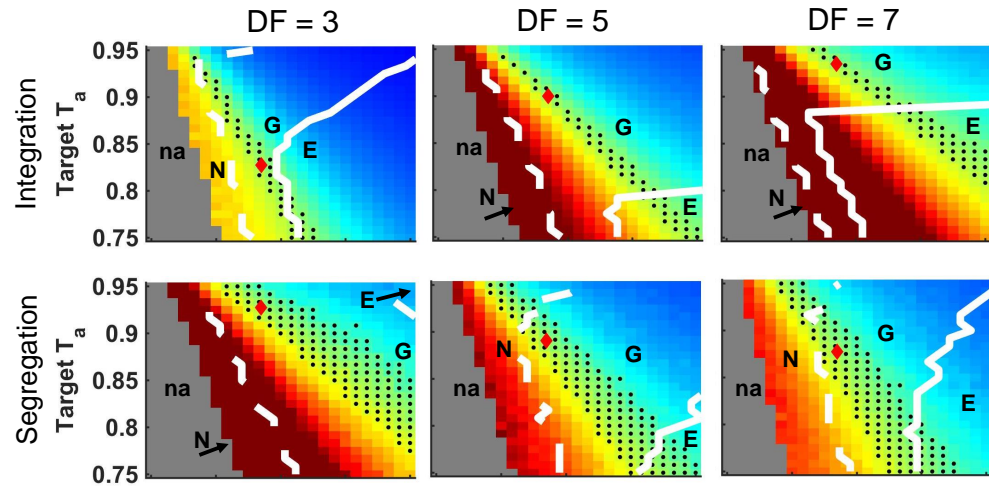

### B. Subsequent Percept

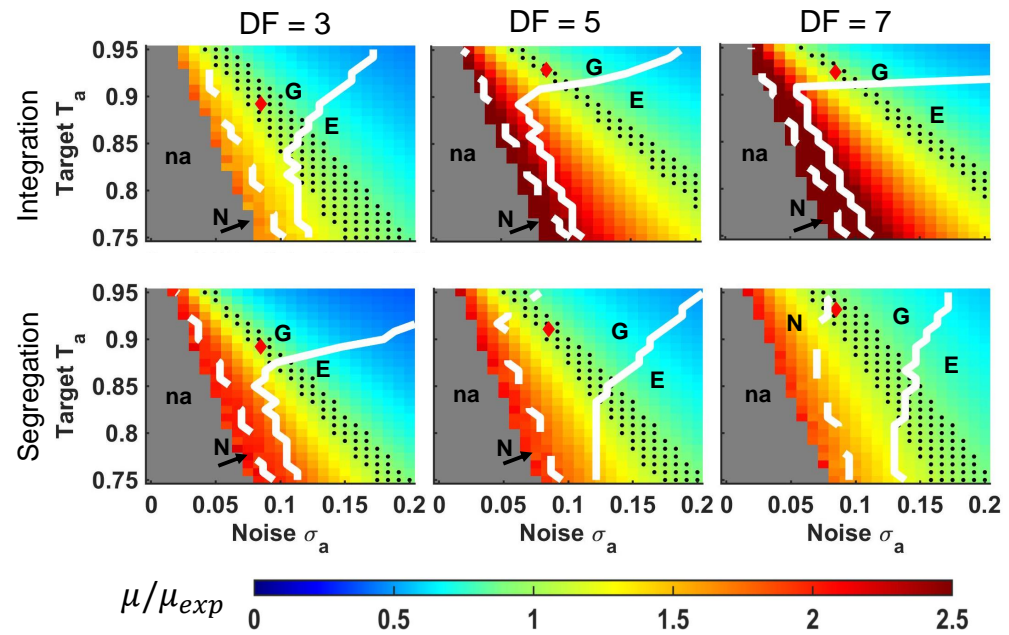

Fig 7

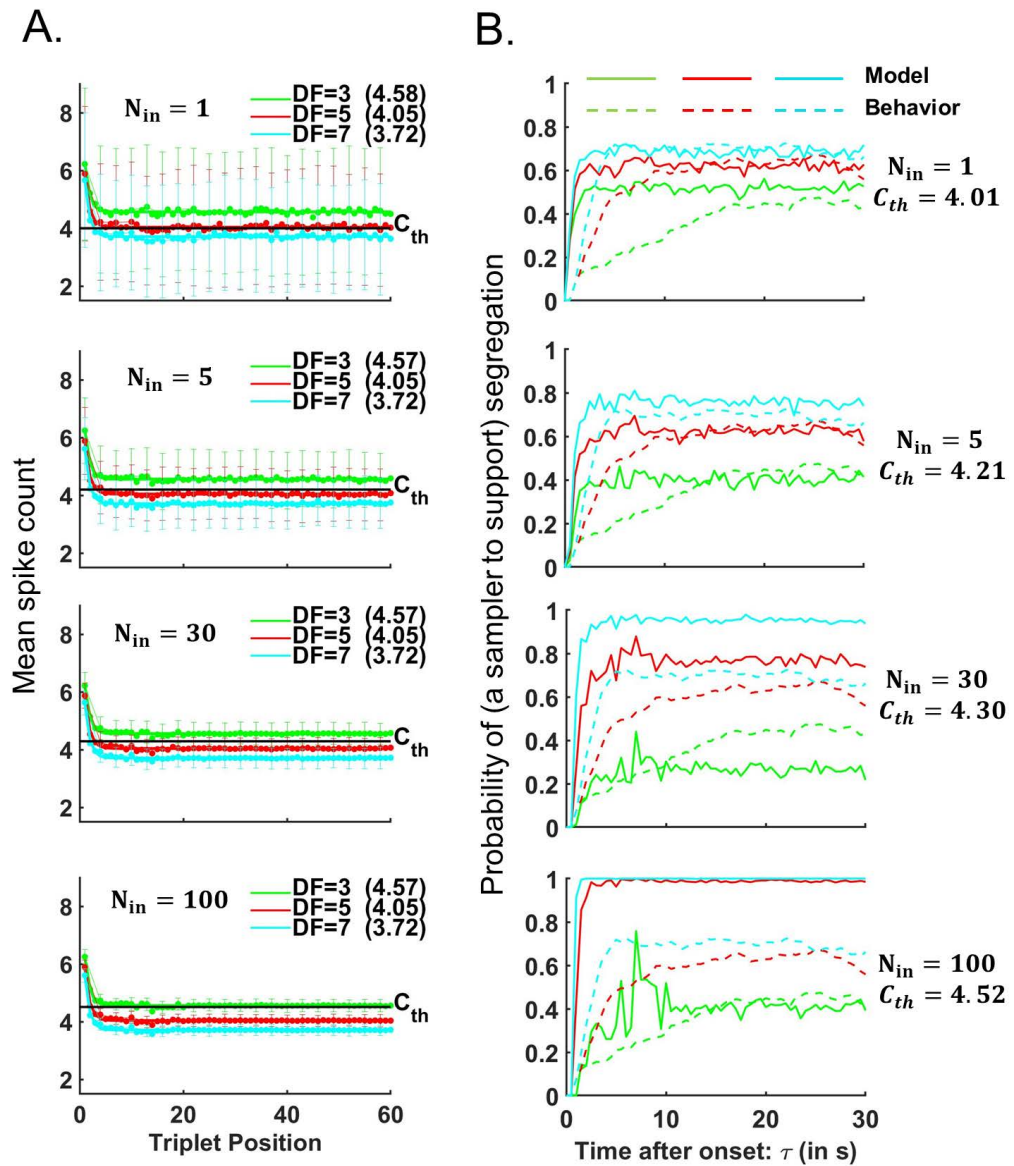

Fig 8

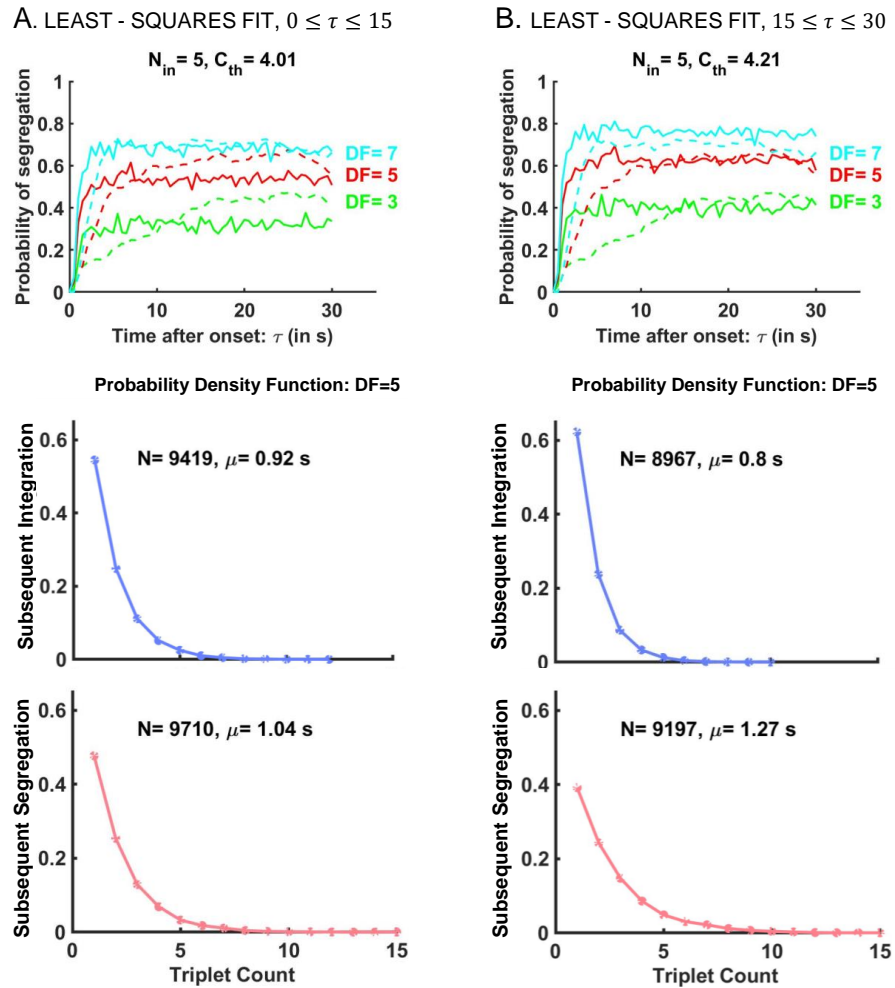

Fig 9

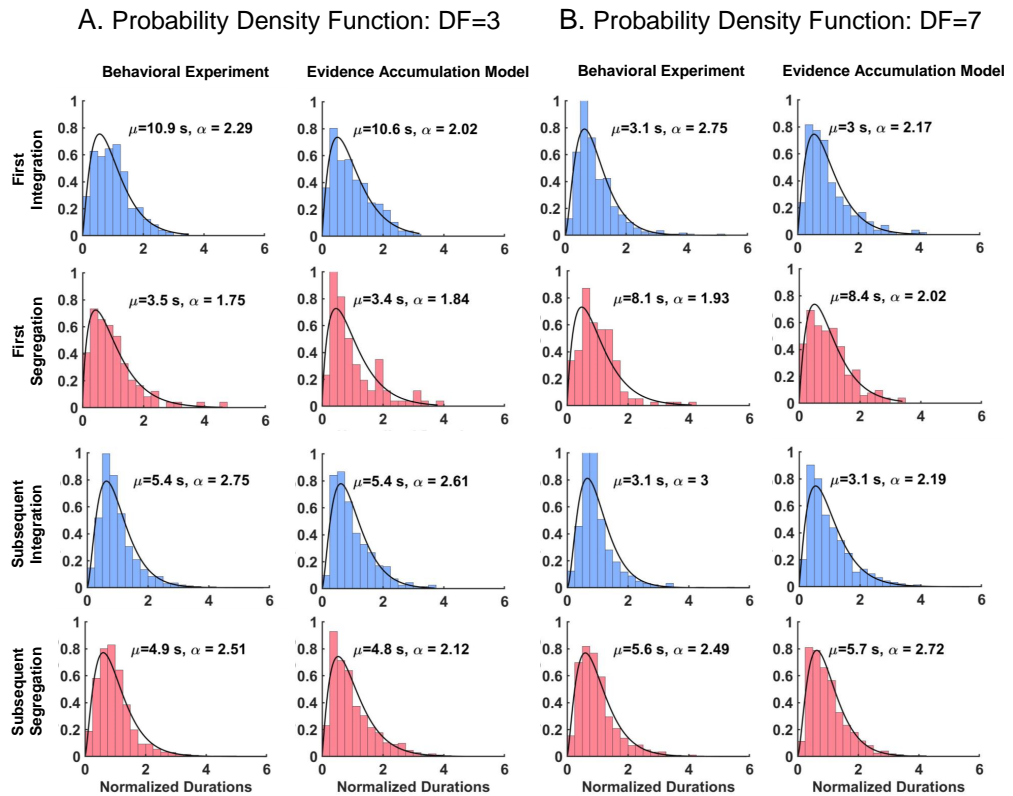

**Fig S1**

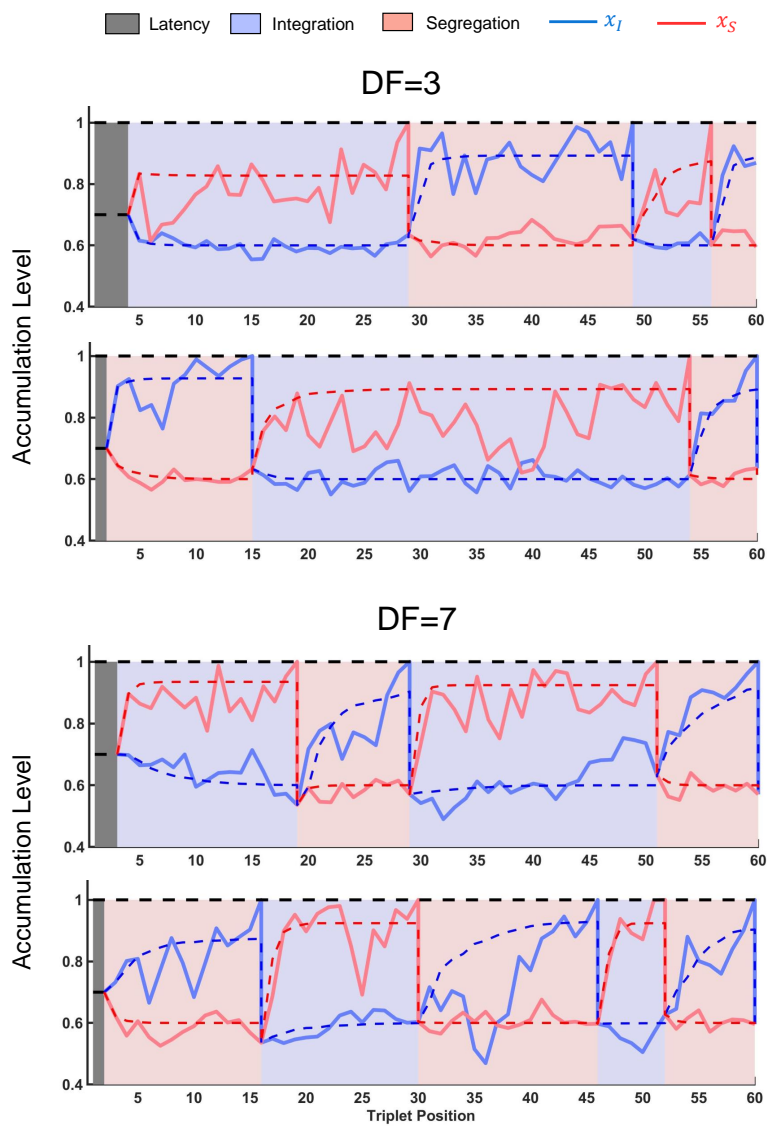

Fig S2

### A. First Percept: DF=5

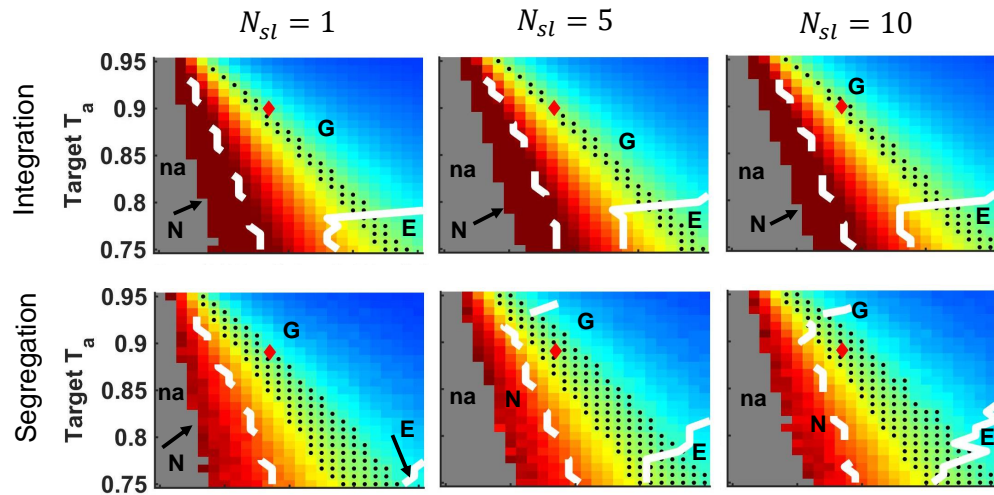

### B. Subsequent Percept: DF=5

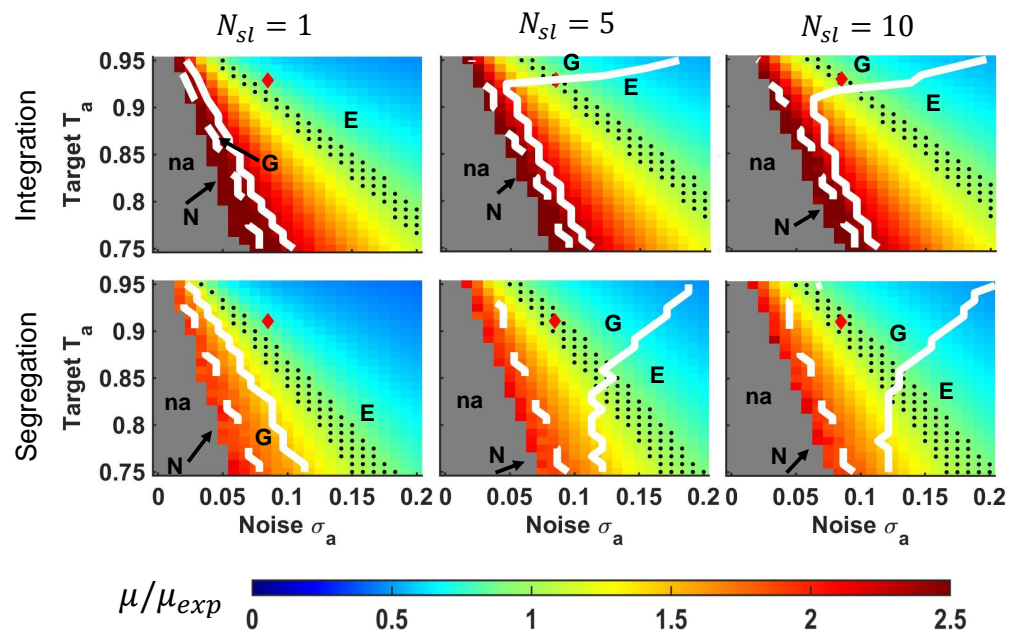

Fig S3



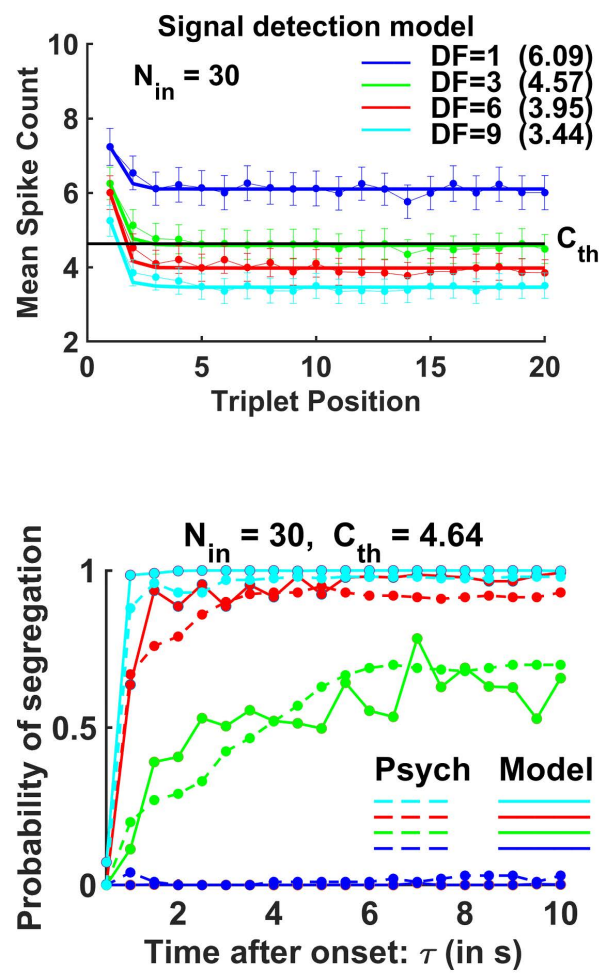

Fig S4

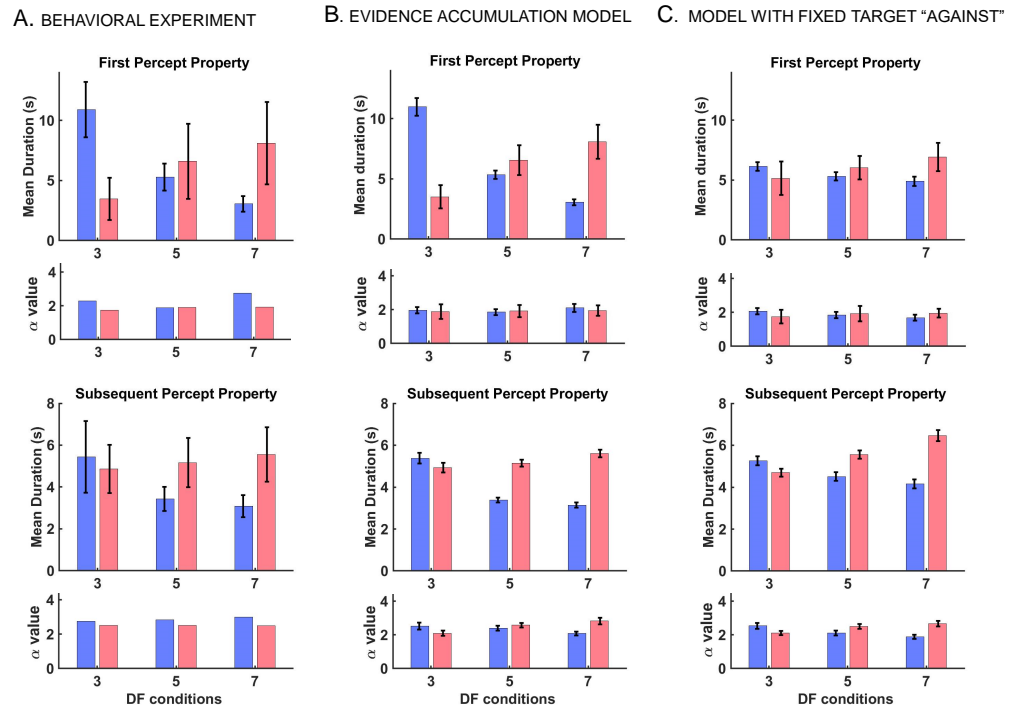

**Fig S5**
